# Supplementary material
Source: PubMed Central journal article supplement (PMC4441324)

**Copy number variants in schizophrenia: confirmation of five previous findings  
and possible association of 3q29 microdeletions and VIPR2 duplications**

**Supplementary Information**

| <b>Table or Figure</b>                                                                                           | <b>Page</b> |
|------------------------------------------------------------------------------------------------------------------|-------------|
| Table S1: Published studies of CNVs in Schizophrenia                                                             | S2          |
| Table S2: CNV calling criteria                                                                                   | S7          |
| Table S3: Regions excluded from CNV analyses (HG18)                                                              | S8          |
| Table S4: MGS dataset CNV counts (Narrow criteria)                                                               | S9          |
| Table S4b: Genome-wide CNVs for case DNAs extracted from LCLs vs. from blood                                     |             |
| Table S5: qPCR results                                                                                           | S10         |
| Table S6: Suggestive point-wise results and comparison with ISC dataset                                          | S11         |
| Table S7: HG18 locations and descriptions of genes in schizophrenia-associated multigenic CNVs                   | S12         |
| Table S8: Case-control analysis of exonic CNVs: Genes with genome-wide suggestive significance in the MGS sample | S15         |
| Table S9: Analyses of number of genome-wide CNVs per subject ("global burden")                                   | S16         |
| Supplementary methods: estimating genome-wide significance thresholds                                            | S18         |
| Figure S1: CNV intensity plots (1q21.1, NRXN1, 15q13.3, 16p11.2, 22q11.21, VIPR2)                                | S21         |

**Table S1: Published studies of CNVs in Schizophrenia**

| First author, Year       | Sample                                                                           | Platforms                              | Analysis package         | Genome-wide vs. focused | Major findings                                                                      | Case:control ratio for reported CNVs in each region: |                |          |         |           |          |
|--------------------------|----------------------------------------------------------------------------------|----------------------------------------|--------------------------|-------------------------|-------------------------------------------------------------------------------------|------------------------------------------------------|----------------|----------|---------|-----------|----------|
|                          |                                                                                  |                                        |                          |                         |                                                                                     | 1q21.1                                               | 2p16.3 (NRXN1) | 15q11.2  | 15q13.2 | 16p11.2   | 22q11.21 |
| Bassett, 2008            | 42 cases/53 controls                                                             | Affy 250K                              | dChip, CNAG, GEMCA       | Genome-wide             | No rare CNV other than 22q11.2 deletion confer susceptibility to SZ                 | NA                                                   | NA             | NA       | NA      | NA        | NA       |
| Bruce, 2009              | 34 probands                                                                      | Array-CGH                              | NA                       | Genome-wide             | Detected a deletion on 5p15.1 in two probands; but no association                   | NA                                                   | NA             | NA       | NA      | NA        | NA       |
| Brunet, 2008             | 190 cases                                                                        | MLPA                                   | NA                       | Focused                 | Foud two 22q11.2 deletions but no duplication                                       | NA                                                   | NA             | NA       | NA      | NA        | 2:0 del  |
| Friedman, 2008           | 335 cases/512 controls                                                           | Array-CGH                              | NA                       | Genome-wide             | Two SZ cases had deletions in CNTNAP2 gene                                          | NA                                                   | NA             | NA       | NA      | NA        | NA       |
| Ikeda, 2009              | 575 cases/ 564 controls                                                          | Diverse                                | Birdsuite                | Genome-wide             | Nonsignificant excess of rare CNVs in SZ ( $p = .087$ )                             | 1:0 del                                              | 1:0 del        | NA       | NA      | NA        | NA       |
| Ingason, 2009            | 4,345 cases/ 35,079 controls                                                     | Diverse                                | Dosage Miner, Quanti SNP | Focused                 | Three-fold excess of duplications and deletions of 16p13.1 in SZ cases              | NA                                                   | NA             | NA       | NA      | NA        | NA       |
| Kirov, 2008              | 93 trios                                                                         | Array CGH                              | CGHPRO                   | Genome-wide             | Two CNVs likely to be pathogenic                                                    | NA                                                   | 1 del          | NA       | 1 dup   | NA        | NA       |
| Kirov, 2009              | 471 cases / 2,792 controls                                                       | Affy 500K                              | Genotyping Console v2.1  | Genome-wide             | Large CNVs (>1Mb) were 2.26 times over-represented in cases                         | 0:2 del                                              | 1:3 del        | 4:14 del | 0:0 del | NA        | 2:0 del  |
| Lee, 2010                | 20 cases                                                                         | Array-based CGH                        | NA                       | Genome-wide             | Cases with negative symptoms have more genic CNVs (13 vs. 6)                        | NA                                                   | NA             | NA       | NA      | NA        | NA       |
| McCarthy, 2009           | 1,906 cases/3,971 controls (discovery); 2,645 cases/2,420 controls (replication) | Diverse                                | a modified HMM           | Focused                 | 16p11.2 micorduplication is strongly associated with SZ                             | NA                                                   | NA             | NA       | NA      | 21: 2 dup | NA       |
| Moon, 2006               | 30 cases/ 20 controls                                                            | Array-CGH                              | NA                       | Genome-wide             | No specific CNV was associated                                                      | NA                                                   | NA             | NA       | NA      | NA        | NA       |
| Mulle, 2010              | 245 cases, 490 controls (discovery); available published data                    | Array-CGH                              | GLAD, GADA, BEAST        | Genome-wide             | Focused on 3q29 deletions (among deletions >500Mb, not in DGV, found only in cases) | NA                                                   | NA             | NA       | NA      | NA        | 2:0      |
| Need, 2009               | 1,013 cases / 1,084 controls                                                     | Affy 6.0 HumanHap300,550, or 610 chips | PennCNV                  | Genome-wide             | Large CNVs (>2Mb) are enriched in cases                                             | 1:0 del                                              | 3:1 del        | NA       | NA      | NA        | 4:0 del  |
| Rodriguez-Santiago, 2009 | 654 cases/ 604 controls                                                          | Diverse                                | PennCNV                  | Focused                 | Common CNVs at two glutathione S-transferase (GST) genes assoicated with SZ         | NA                                                   | NA             | NA       | NA      | NA        | NA       |

|                     |                                                                                                                                           |              |                                |             |                                                                                                                                                               |             |                         |              |            |             |             |
|---------------------|-------------------------------------------------------------------------------------------------------------------------------------------|--------------|--------------------------------|-------------|---------------------------------------------------------------------------------------------------------------------------------------------------------------|-------------|-------------------------|--------------|------------|-------------|-------------|
| Rujescu, 2008       | 2,977 cases/<br>33,746 controls                                                                                                           | Diverse      | Dosage<br>Miner,<br>Quanti SNP | Focused     | NRXN1 deletions affecting<br>exons confer risk of SZ                                                                                                          | NA          | 12:49<br>del;2:3<br>dup | NA           | NA         | NA          | NA          |
| Stefansson,<br>2008 | 1,433 cases /<br>33,250 controls; 3<br>CNVs (1q21.1,<br>15q11.2 and<br>15q13.3) were<br>followed up in 3,285<br>cases / 7,951<br>controls | Diverse      | Dosage<br>Miner                | Genome-wide | Three rare CNVs (1q21.1,<br>15q11.2, and 15q13.3)<br>showed nominal association                                                                               | 11:8<br>del | 0:2 del                 | 26:79<br>del | 7:8<br>del | 2:11<br>del | 8:0 del     |
| Steinbert, 2010     | 4,235 cases<br>(psychosis) / 3,9481<br>controls                                                                                           | Diverse      | PennCNV                        | Focused     | Two CNVs in ZNF804A in<br>psychosis patients and none<br>in controls                                                                                          | NA          | NA                      | NA           | NA         | NA          | NA          |
| Stone, 2008         | 3,391 cases / 3,181<br>controls                                                                                                           | Affy 5.0/6.0 | Birdsuite                      | Genome-wide | Rare (<1%) and large CNVs<br>(>100kb) are enriched in<br>cases (1.15-fold); 3 regions<br>(1q21.1, 15q13.2, and<br>22q11.21) showed significant<br>association | 10:1<br>del | 5:6 del                 | 26:11<br>del | 9:0<br>del | 5:1<br>dup  | 13:0<br>del |
| Walsh, 2008         | 150 cases / 268<br>controls; 92<br>childhood onset<br>cases                                                                               | Array CGH    | ROMA                           | Genome-wide | Rare CNVs in 15% cases vs.<br>5% controls                                                                                                                     | 1:0 del     | 1:0 del                 | NA           | NA         | 2:0<br>dup  | NA          |
| Wilson, 2006        | 35 cases/ 35<br>controls                                                                                                                  | Array-CGH    | NA                             | Genome-wide | 4 loci with CNV were only in<br>cases                                                                                                                         | NA          | NA                      | NA           | NA         | NA          | NA          |
| Xu, 2008            | 359 trios<br>(screening); 152<br>cases / 159 controls                                                                                     | Affy 5.0     | dCHIP                          | Genome-wide | In sporadic cases, frequency<br>of rare de novo CNVs was<br>10% vs. 1.3% in controls                                                                          | 1:0 del     | NA                      | NA           | NA         | NA          | 3:0 del     |
| Xu, 2009            | 48 familial, 152<br>sporadic cases/159<br>controls                                                                                        | Affy 5.0     | Birdsuite                      | Genome-wide | Rare genic CNVs are<br>enriched in familial cases vs.<br>controls.                                                                                            | NA          | NA                      | NA           | NA         | NA          | NA          |

See references below. The table provides summaries of findings in published papers on CNVs in schizophrenia. Note that in the main text, we only use data from large studies or meta-analyses which are technically comparable to the MGS analysis (Affymetrix or Illumina GWAS chips; data reported genome-wide or for CNVs of interest in large samples). We have not attempted to combine all data from the studies described in the table, many of which are focused studies of specific regions, or involved small samples, or overlap with samples reported in the large studies cited in the main text and tables.

## References for Table S1

1. Bassett AS, Marshall CR, Lionel AC, Chow EW, Scherer SW. Copy number variations and risk for schizophrenia in 22q11.2 deletion syndrome. *Hum Mol Genet.* 2008 Dec 15;17(24):4045-53. Epub 2008 Sep 20. Erratum in: *Hum Mol Genet.* 2009 May 1;18(9):1717. PubMed PMID: 18806272; PubMed Central PMCID: PMC2638574.
2. Bruce HA, Sachs N, Rudnicki DD, Lin SG, Willour VL, Cowell JK, Conroy J, McQuaid DE, Rossi M, Gaile DP, Nowak NJ, Holmes SE, Sklar P, Ross CA, Delisi LE, Margolis RL. Long tandem repeats as a form of genomic copy number variation: structure and length polymorphism of a chromosome 5p repeat in control and schizophrenia populations. *Psychiatr Genet.* 2009 Apr;19(2):64-71. PubMed PMID: 19672138.
3. Brunet A, Armengol L, Pelaez T, Guillamat R, Vallès V, Gabau E, Estivill X, Guitart M. Failure to detect the 22q11.2 duplication syndrome rearrangement among patients with schizophrenia. *Behav Brain Funct.* 2008 Feb 19;4:10. PubMed PMID: 18284679; PubMed Central PMCID: PMC2278148.
4. Friedman JI, Vrijenhoek T, Markx S, Janssen IM, van der Vliet WA, Faas BH, Knoers NV, Cahn W, Kahn RS, Edelmann L, Davis KL, Silverman JM, Brunner HG, van Kessel AG, Wijmenga C, Ophoff RA, Veltman JA. CNTNAP2 gene dosage variation is associated with schizophrenia and epilepsy. *Mol Psychiatry.* 2008 Mar;13(3):261-6. Epub 2007 Jul 24. PubMed PMID: 17646849.
5. Ikeda M, Aleksic B, Kirov G, Kinoshita Y, Yamanouchi Y, Kitajima T, Kawashima K, Okochi T, Kishi T, Zaharieva I, Owen MJ, O'Donovan MC, Ozaki N, Iwata N. Copy number variation in schizophrenia in the Japanese population. *Biol Psychiatry.* 2010 Feb 1;67(3):283-6. Epub 2009 Oct 31. PubMed PMID: 19880096.
6. Ingason A, Rujescu D, Cichon S, Sigurdsson E, Sigmundsson T, Pietiläinen OP, Buizer-Voskamp JE, Strengman E, Francks C, Muglia P, Gylfason A, Gustafsson O, Olason PI, Steinberg S, Hansen T, Jakobsen KD, Rasmussen HB, Giegling I, Möller HJ, Hartmann A, Crombie C, Fraser G, Walker N, Lonnqvist J, Suvisaari J, Tuulio-Henriksson A, Bramon E, Kiemenev LA, Franke B, Murray R, Vassos E, Touloupoulou T, Mühleisen TW, Tosato S, Ruggeri M, Djurovic S, Andreassen OA, Zhang Z, Werge T, Ophoff RA; GROUP Investigators, Rietschel M, Nöthen MM, Petursson H, Stefansson H, Peltonen L, Collier D, Stefansson K, Clair DM. Copy number variations of chromosome 16p13.1 region associated with schizophrenia. *Mol Psychiatry.* 2009 Sep 29. [Epub ahead of print] PubMed PMID: 19786961.
7. International Schizophrenia Consortium. Rare chromosomal deletions and duplications increase risk of schizophrenia. *Nature.* 2008 Sep 11;455(7210):237-41. Epub 2008 Jul 30. PubMed PMID: 18668038.
8. Kirov G, Grozeva D, Norton N, Ivanov D, Mantripragada KK, Holmans P; International Schizophrenia Consortium; Wellcome Trust Case Control Consortium, Craddock N, Owen MJ, O'Donovan MC. Support for the involvement of large copy number variants in the pathogenesis of schizophrenia. *Hum Mol Genet.* 2009 Apr 15;18(8):1497-503. Epub 2009 Jan 29. PubMed PMID: 19181681; PubMed Central PMCID: PMC2664144.
9. Kirov G, Gumus D, Chen W, Norton N, Georgieva L, Sari M, O'Donovan MC, Erdogan F, Owen MJ, Ropers HH, Ullmann R. Comparative genome hybridization suggests a role for NRXN1 and APBA2 in schizophrenia. *Hum Mol Genet.* 2008 Feb 1;17(3):458-65. Epub 2007 Nov 6. PubMed PMID: 17989066.
10. Lee CH, Liu CM, Wen CC, Chang SM, Hwu HG. Genetic copy number variants in sib pairs both affected with schizophrenia. *J Biomed Sci.* 2010 Jan 11;17:2. PubMed PMID: 20064257; PubMed Central PMCID: PMC2843606.
11. McCarthy SE, Makarov V, Kirov G, Addington AM, McClellan J, Yoon S, Perkins DO, Dickel DE, Kusenda M, Krastoshevsky O, Krause V, Kumar RA, Grozeva D, Malhotra D, Walsh T, Zackai EH, Kaplan P, Ganesh J, Krantz ID, Spinner NB, Roccanova P, Bhandari A, Pavon K, Lakshmi B, Leotta A, Kendall J, Lee YH, Vacic V, Gary S, Iakoucheva LM, Crow TJ, Christian SL, Lieberman JA, Stroup TS, Lehtimäki T, Puura K, Haldeman-Englert C, Pearl J, Goodell M, Willour VL, Derosse P, Steele J, Kassem L, Wolff J, Chitkara N, McMahon FJ, Malhotra AK, Potash JB, Schulze TG, Nöthen MM, Cichon S, Rietschel M, Leibenluft E, Kustanovich V, Lajonchere CM, Sutcliffe JS, Skuse D, Gill M, Gallagher L, Mendell NR; Wellcome Trust Case Control Consortium, Craddock N, Owen MJ, O'Donovan MC, Shaikh TH, Susser E, Delisi LE, Sullivan PF, Deutsch CK, Rapoport J, Levy DL, King MC, Sebat J. Microduplications of 16p11.2 are associated with schizophrenia. *Nat Genet.* 2009 Nov;41(11):1223-7. Epub 2009 Oct 25. PubMed PMID: 19855392.

12. Moon HJ, Yim SV, Lee WK, Jeon YW, Kim YH, Ko YJ, Lee KS, Lee KH, Han SI, Rha HK. Identification of DNA copy-number aberrations by array-comparative genomic hybridization in patients with schizophrenia. *Biochem Biophys Res Commun.* 2006 Jun 2;344(2):531-9. Epub 2006 Apr 3. PubMed PMID: 16630559.
13. Mulle JG, Dodd AF, McGrath JA, Wolyniec PS, Mitchell AA, Shetty AC, Sobreira NL, Valle D, Rudd MK, Satten G, Cutler DJ, Pulver AE, Warren ST: Microdeletions of 3q29 confer high risk for schizophrenia. *Am J Hum Genet* 2010; 87(2):229-36. Pubmed PMID: 20691406.
14. Need AC, Ge D, Weale ME, Maia J, Feng S, Heinzen EL, Shianna KV, Yoon W, Kasperaviciute D, Gennarelli M, Strittmatter WJ, Bonvicini C, Rossi G, Jayathilake K, Cola PA, McEvoy JP, Keefe RS, Fisher EM, St Jean PL, Giegling I, Hartmann AM, Möller HJ, Ruppert A, Fraser G, Crombie C, Middleton LT, St Clair D, Roses AD, Muglia P, Francks C, Rujescu D, Meltzer HY, Goldstein DB. A genome-wide investigation of SNPs and CNVs in schizophrenia. *PLoS Genet.* 2009 Feb;5(2):e1000373. Epub 2009 Feb 6. Erratum in: *PLoS Genet.* 2009 Mar;5(3). doi: 10.1371/annotation/e0196ebb-de40-453f-8f8c-791b126618da. PubMed PMID: 19197363; PubMed Central PMCID: PMC2631150.
15. Rodríguez-Santiago B, Brunet A, Sobrino B, Serra-Juhé C, Flores R, Armengol L, Vilella E, Gabau E, Guitart M, Guillamat R, Martorell L, Valero J, Gutiérrez-Zotes A, Labad A, Carracedo A, Estivill X, Pérez-Jurado LA. Association of common copy number variants at the glutathione S-transferase genes and rare novel genomic changes with schizophrenia. *Mol Psychiatry.* 2009 Jun 16. [Epub ahead of print] PubMed PMID: 19528963.
16. Rujescu D, Ingason A, Cichon S, Pietiläinen OP, Barnes MR, Touloupoulou T, Picchioni M, Vassos E, Ettinger U, Bramon E, Murray R, Ruggeri M, Tosato S, Bonetto C, Steinberg S, Sigurdsson E, Sigmundsson T, Petursson H, Gylfason A, Olason PI, Hardarsson G, Jonsdottir GA, Gustafsson O, Fossdal R, Giegling I, Möller HJ, Hartmann AM, Hoffmann P, Crombie C, Fraser G, Walker N, Lonnqvist J, Suvisaari J, Tuulio-Henriksson A, Djurovic S, Melle I, Andreassen OA, Hansen T, Werge T, Kiemenev LA, Franke B, Veltman J, Buizer-Voskamp JE; GROUP Investigators, Sabatti C, Ophoff RA, Rietschel M, Nöthen MM, Stefansson K, Peltonen L, St Clair D, Stefansson H, Collier DA. Disruption of the neurexin 1 gene is associated with schizophrenia. *Hum Mol Genet.* 2009 Mar 1;18(5):988-96. Epub 2008 Oct 22. PubMed PMID: 18945720; PubMed Central PMCID: PMC2695245.
17. Stefansson H, Rujescu D, Cichon S, Pietiläinen OP, Ingason A, Steinberg S, Fossdal R, Sigurdsson E, Sigmundsson T, Buizer-Voskamp JE, Hansen T, Jakobsen KD, Muglia P, Francks C, Matthews PM, Gylfason A, Halldorsson BV, Gudbjartsson D, Thorgeirsson TE, Sigurdsson A, Jonasdottir A, Jonasdottir A, Bjornsson A, Mattiasdottir S, Blondal T, Haraldsson M, Magnusdottir BB, Giegling I, Möller HJ, Hartmann A, Shianna KV, Ge D, Need AC, Crombie C, Fraser G, Walker N, Lonnqvist J, Suvisaari J, Tuulio-Henriksson A, Paunio T, Touloupoulou T, Bramon E, Di Forti M, Murray R, Ruggeri M, Vassos E, Tosato S, Walshe M, Li T, Vasilescu C, Mühleisen TW, Wang AG, Ullum H, Djurovic S, Melle I, Olesen J, Kiemenev LA, Franke B; GROUP, Sabatti C, Freimer NB, Gulcher JR, Thorsteinsdottir U, Kong A, Andreassen OA, Ophoff RA, Georgi A, Rietschel M, Werge T, Petursson H, Goldstein DB, Nöthen MM, Peltonen L, Collier DA, St Clair D, Stefansson K. Large recurrent microdeletions associated with schizophrenia. *Nature.* 2008 Sep 11;455(7210):232-6. PubMed PMID: 18668039; PubMed Central PMCID: PMC2687075.
18. Steinberg S, Mors O, Børglum AD, Gustafsson O, Werge T, Mortensen PB, Andreassen OA, Sigurdsson E, Thorgeirsson TE, Böttcher Y, Olason P, Ophoff RA, Cichon S, Gudjonsdottir IH, Pietiläinen OP, Nyegaard M, Tuulio-Henriksson A, Ingason A, Hansen T, Athanasiu L, Suvisaari J, Lonnqvist J, Paunio T, Hartmann A, Jürgens G, Nordentoft M, Hougaard D, Norgaard-Pedersen B, Breuer R, Möller HJ, Giegling I, Glenthøj B, Rasmussen HB, Mattheisen M, Bitter I, Réthelyi JM, Sigmundsson T, Fossdal R, Thorsteinsdottir U, Ruggeri M, Tosato S, Strengman E; GROUP, Kiemenev LA, Melle I, Djurovic S, Abramova L, Kaleda V, Walshe M, Bramon E, Vassos E, Li T, Fraser G, Walker N, Touloupoulou T, Yoon J, Freimer NB, Cantor RM, Murray R, Kong A, Golimbet V, Jönsson EG, Terenius L, Agartz I, Petursson H, Nöthen MM, Rietschel M, Peltonen L, Rujescu D, Collier DA, Stefansson H, St Clair D, Stefansson K. Expanding the range of ZNF804A variants conferring risk of psychosis. *Mol Psychiatry.* 2010 Jan 5. [Epub ahead of print] PubMed PMID: 20048749.
19. Walsh T, McClellan JM, McCarthy SE, Addington AM, Pierce SB, Cooper GM, Nord AS, Kusenda M, Malhotra D, Bhandari A, Stray SM, Rippey CF, Roccanova P, Makarov V, Lakshmi B, Findling RL,

Sikich L, Stromberg T, Merriman B, Gogtay N, Butler P, Eckstrand K, Noory L, Gochman P, Long R, Chen Z, Davis S, Baker C, Eichler EE, Meltzer PS, Nelson SF, Singleton AB, Lee MK, Rapoport JL, King MC, Sebat J. Rare structural variants disrupt multiple genes in neurodevelopmental pathways in schizophrenia. *Science*. 2008 Apr 25;320(5875):539-43. Epub 2008 Mar 27. PubMed PMID: 18369103.

20. Wilson GM, Flibotte S, Chopra V, Melnyk BL, Honer WG, Holt RA. DNA copy-number analysis in bipolar disorder and schizophrenia reveals aberrations in genes involved in glutamate signaling. *Hum Mol Genet*. 2006 Mar 1;15(5):743-9. Epub 2006 Jan 24. PubMed PMID: 16434481.
21. Xu B, Woodroffe A, Rodriguez-Murillo L, Roos JL, van Rensburg EJ, Abecasis GR, Gogos JA, Karayiorgou M. Elucidating the genetic architecture of familial schizophrenia using rare copy number variant and linkage scans. *Proc Natl Acad Sci U S A*. 2009 Sep 29;106(39):16746-51. Epub 2009 Sep 11. PubMed PMID: 19805367; PubMed Central PMCID: PMC2757863.
22. Xu B, Roos JL, Levy S, van Rensburg EJ, Gogos JA, Karayiorgou M. Strong association of de novo copy number mutations with sporadic schizophrenia. *Nat Genet*. 2008 Jul;40(7):880-5. Epub 2008 May 30. PubMed PMID: 18511947.

**Table S2: CNV calling criteria**

| CN         | -----Broad criteria----- |     |      |             | -----Narrow criteria----- |     |       |             |
|------------|--------------------------|-----|------|-------------|---------------------------|-----|-------|-------------|
|            | Probes                   | LOD | N    | Concordance | Probes                    | LOD | N     | Concordance |
| <b>0</b>   | 3                        | 2   | 431  | 0.83        | 5                         | 6   | 152   | 0.93        |
| <b>1</b>   | 5                        | 2   | 3833 | 0.84        | 6                         | 6*  | 1,928 | 0.93        |
| <b>3,4</b> | 6                        | 6   | 1042 | 0.72        | 6                         | 10  | 622   | 0.78        |

\* If lod >5 but < 6, then mininum probes = 9

Shown are the Narrow and Broad CNV calling criteria for each copy number (CN). Narrow criteria were used in the primary analyses. Probes = the minimum number of probes within the CNV call; LOD = the minimum Birdseye LOD score required to make the call. N = the number of calls made in 151 specimens used in the analysis of duplicate concordance used to validate the criteria. Concordance = the proportion of calls in DNA specimen "1" for a given subject (meeting these criteria) that overlapped by at least 50% with a call in the same direction (deletion or duplication) in specimen "2" for that subject (with no minimum call criteria for specimen 2).

**Table S3: Regions excluded from CNV analyses (HG18)**

**Immunoglobulin gene regions**

chr2:88937989-89411302  
chr14:105065301-106352275  
chr14:21159897-22090937  
chr22:20715572-21595082

**Centromic regions**

chr1:121100001-128000000  
chr2:91000001-95700000  
chr3:89400001-93200000  
chr4:48700001-52400000  
chr5:45800001-50500000  
chr6:58400001-63400000  
chr7:57400001-61100000  
chr8:43200001-48100000  
chr9:46700001-60300000  
chr10:38800001-42100000  
chr11:51400001-56400000  
chr12:33200001-36500000  
chr13:13500001-18400000  
chr14:13600001-19100000  
chr15:14100001-18400000  
chr16:34400001-40700000  
chr17:22100001-23200000  
chr18:15400001-17300000  
chr19:26700001-30200000  
chr20:25700001-28400000  
chr21:10000001-13200000  
chr22:9600001-16300000  
chrX:56600001-65000000  
chrY:11200001-12500000

**Telomeric regions (100kb from pter or qter)**

chr1:1-100000  
chr2:1-100000  
chr3:1-100000  
chr4:1-100000  
chr5:1-100000  
chr6:1-100000  
chr7:1-100000  
chr8:1-100000  
chr9:1-100000  
chr10:1-100000  
chr11:1-100000  
chr12:1-100000  
chr13:1-100000  
chr14:1-100000  
chr15:1-100000  
chr16:1-100000  
chr17:1-100000  
chr18:1-100000  
chr19:1-100000  
chr20:1-100000  
chr21:1-100000  
chr22:1-100000  
chrX:1-100000  
chrY:1-100000  
chr1:247149719-247249719  
chr2:242851149-242951149  
chr3:199401827-199501827  
chr4:191173063-191273063  
chr5:180757866-180857866  
chr6:170799992-170899992  
chr7:158721424-158821424  
chr8:146174826-146274826  
chr9:140173252-140273252  
chr10:135274737-135374737  
chr11:134352384-134452384  
chr12:132249534-132349534  
chr13:114042980-114142980  
chr14:106268585-106368585  
chr15:100238915-100338915  
chr16:88727254-88827254  
chr17:78674742-78774742  
chr18:76017153-76117153  
chr19:63711651-63811651  
chr20:62335964-62435964  
chr21:46844323-46944323  
chr22:49591432-49691432  
chrX:154813754-154913754  
chrY:57672954-57772954



**Table S4: MGS dataset CNV counts (Narrow criteria)**

|                      | Total CNVs | CNVs/<br>subject | Large<br>(>100kb) | CNVs/<br>subject |
|----------------------|------------|------------------|-------------------|------------------|
| <b>ALL</b>           |            |                  |                   |                  |
| <b>Deletions</b>     | 452,007    | 62.05            | 45,791            | 6.29             |
| <b>Duplications</b>  | 68,916     | 9.46             | 31,415            | 4.31             |
| <b>RARE (&lt;1%)</b> |            |                  |                   |                  |
| <b>Deletions</b>     | 37,561     | 5.16             | 4,243             | 0.58             |
| <b>Duplications</b>  | 13,746     | 1.89             | 5,044             | 0.69             |

Shown are the total number of deletions or of duplications in the dataset of 7,285 subjects, and the number per subject, separately for CNVs of all sizes (Total) and those larger than 100,000 bp, and for CNVs of all frequencies (ALL) or <1% frequency (RARE -- filtered by PLINK as discussed in the text). for CNVs meeting the Narrow call criteria (Table S2). These N's were observed after data cleaning, i.e., after exclusion of samples, merger of segments as described in the main text, exclusion of CNVs in the regions listed in Table S3, and exclusion of CNVs with apparent plate effects (most CNVs in the region from specimens on 1 or 2 plates).

**Table S4b: Genome-wide CNVs for case DNAs extracted from LCLs vs. from blood**

|               | NARROW LARGE DELS |        |        | NARROW LARGE DUPS |        |        | NARROW SMALL DELS |              |       | NARROW SMALL DUPS |       |       |
|---------------|-------------------|--------|--------|-------------------|--------|--------|-------------------|--------------|-------|-------------------|-------|-------|
|               | EMP-P             | LCL    | BLOOD  | EMP1              | LCL    | BLOOD  | EMP-P             | LCL          | BLOOD | EMP1              | LCL   | BLOOD |
| <b>N CNVs</b> |                   | 1613   | 496    |                   | 1944   | 650    |                   | 12986        | 3902  |                   | 3437  | 1106  |
| <b>RATE</b>   | 0.3590            | 0.537  | 0.526  | 0.9017            | 0.648  | 0.689  | <b>0.0263</b>     | 4.326        | 4.138 | 0.7630            | 1.145 | 1.173 |
| <b>PROP</b>   | 0.2000            | 0.405  | 0.389  | 0.9122            | 0.463  | 0.488  | 0.5454            | 0.962        | 0.962 | 0.8192            | 0.671 | 0.686 |
| <b>KBTOT</b>  | 0.5274            | 373.7  | 375.3  | 0.9886            | 454.8  | 517.0  | 0.5310            | 81.7         | 81.9  | 0.0207            | 67.9  | 63.3  |
| <b>KBAVG</b>  | 0.3986            | 277.3  | 272.6  | 0.9800            | 328.4  | 366.7  | 0.9620            | 19.0         | 19.9  | 0.0018            | 40.2  | 37.2  |
| <b>GRATE</b>  | 0.4849            | 0.630  | 0.621  | 0.5124            | 1.346  | 1.349  | 0.4564            | 1.383        | 1.375 | 0.0242            | 0.754 | 0.668 |
| <b>GPROP</b>  | 0.2204            | 0.228  | 0.215  | 0.6869            | 0.348  | 0.356  | 0.5643            | 0.690        | 0.691 | 0.1869            | 0.404 | 0.387 |
| <b>GRICH</b>  | 0.6083            | 0.0048 | 0.0049 | 0.1220            | 0.0076 | 0.0071 | 0.6048            | 0.026        | 0.025 | 0.2865            | 0.021 | 0.019 |
|               | BROAD LARGE DELS  |        |        | BROAD LARGE DUPS  |        |        | BROAD SMALL DELS  |              |       | BROAD SMALL DUPS  |       |       |
| <b>N CNVs</b> |                   | 1619   | 500    |                   | 2051   | 729    |                   | 22774        | 6553  |                   | 4873  | 1587  |
| <b>RATE</b>   | 0.4299            | 0.540  | 0.534  | 0.998             | 0.684  | 0.779  | <b>0.0001</b>     | <b>7.599</b> | 7.001 | 0.907             | 1.626 | 1.696 |
| <b>PROP</b>   | 0.2491            | 0.412  | 0.399  | 0.997             | 0.481  | 0.531  | 0.3843            | 0.996        | 0.995 | 0.832             | 0.778 | 0.792 |
| <b>KBTOT</b>  | 0.6972            | 365    | 377.1  | 0.996             | 457.2  | 526.8  | 0.1197            | 98.71        | 95.86 | 0.391             | 72.82 | 72.12 |
| <b>KBAVG</b>  | 0.5970            | 273.8  | 277.6  | 0.987             | 322.1  | 359.8  | 0.9535            | 13.71        | 14.28 | <b>0.010</b>      | 35.33 | 33.29 |
| <b>GRATE</b>  | 0.4062            | 0.644  | 0.620  | 0.553             | 1.393  | 1.404  | <b>0.0375</b>     | <b>2.51</b>  | 2.377 | 0.003             | 0.976 | 0.847 |
| <b>GPROP</b>  | 0.2490            | 0.226  | 0.215  | 0.897             | 0.358  | 0.380  | 0.1310            | 0.881        | 0.867 | 0.112             | 0.496 | 0.471 |
| <b>GRICH</b>  | 0.3626            | 0.0045 | 0.0044 | 0.027             | 0.0076 | 0.0067 | 0.4174            | 0.036        | 0.035 | 0.523             | 0.023 | 0.023 |

Shown are PLINK analyses of genome-wide rare (<1%) CNV counts for **cases** with LCL- vs. Blood-derived DNA after QC, for Narrow and Broad call criteria, deletions and duplications, and large (>100kb) or small (<100kb) CNVs -- after excluding CNVs > 4 Mb and CNVs in the established association regions shown in Table 1 of the main text. Ns are total CNVs for all subjects (3,002 with LCL and 943 with blood DNA for Narrow; 2997 and 936 for Broad, where a few additional subjects were excluded from analyses). Nominal empirical (permutation-based) P-values are shown. LCL and Blood columns show mean values (per subject) for each variable. RATE=CNVs/subject; PROP=proportion of subjects with at least 1 CNV; KBTOT = kb of CNV/subject; KBAVG = mean CNV size; GRATE = number of genes spanned per CNV; GPROP = proportion of CNVs with at least one gene; GRICH = number of genes per total CNV kb.

After QC (excluding subjects and CNVs with possible LCL effects such as large numbers of CNVs or low intensity variance), there were no LCL-blood differences for large CNVs. For small CNVs, LCL DNAs had 4.5% more deletions (by the Narrow call criteria used in our analyses), but not more duplications. The effect was more pronounced for Broad small deletions. Thus the effect was from small deletion calls, and particularly those with lower lod scores, possibly due to lower-variance specimens which did not meet the exclusion threshold. The ratios of LCL:Blood CNV rates were 1.045 for Narrow and 1.085 for Broad small deletions.

As shown in Table S9 below, the excess of genic CNVs in cases was limited to large deletions, for which no LCL-blood difference was observed. However, because more controls than cases had LCL specimens, the small excess of small deletions in LCL specimens would make the case:control analyses of small deletions slightly conservative. Examination of pointwise data for LCL specimens did not reveal additional associations than were reported here.

**Table S5: qPCR results**

| CNV regions                      | N probes‡ | -----N(CNVs) ----- |           | ----N probes in CNVs---- |              | Probes tested in controls |               |
|----------------------------------|-----------|--------------------|-----------|--------------------------|--------------|---------------------------|---------------|
|                                  |           | Predicted          | Confirmed | Predicted                | Inconsistent | Total                     | Del/Dup calls |
| 1q21                             | 6         | 12                 | 12        | 239                      | 11           | 239                       | 11            |
| NRXN1 (exonic dels)              | 3         | 10                 | 10        | 14                       | 0            | 51                        | 0             |
| 15q13.2 dup and del*             | 17        | 12                 | 12        | 164                      | 13           | 204                       | 1             |
| 16p11.2 dup and del**            | 12        | 18                 | 18        | 191                      | 20           | 328                       | 7             |
| 22q11.21 del                     | 4         | 18                 | 18        | 76                       | 0            | 159                       | 22            |
| VIPR2                            | 2         | 12                 | 12        | 24                       | 1            | 42                        | 0             |
| 3q29                             | 3         | 5                  | 5         | 15                       | 0            | 30                        | 0             |
| 3p26.1 (intergenic) <sup>#</sup> | 2         | 13                 | 13        | 26                       | 0            | 42                        | 1             |
| 3q26.1 (intergenic)              | 2         | 5                  | 5         | 9                        | 0            | 42                        | 5             |
| NEDD4L                           | 2         | 7                  | 7         | 14                       | 0            | 42                        | 2             |
| CGNL1 <sup>#</sup>               | 2         | 13                 | 13        | 26                       | 5            | 42                        | 0             |
| DLG2_del <sup>#</sup>            | 2         | 4                  | 4         | 4                        | 0            | 42                        | 1             |
| WWOX <sup>#</sup>                | 2         | 6                  | 6         | 12                       | 0            | 42                        | 5             |
| Totals                           |           | 135                | 135       | 814                      | 50           | 1305                      | 55            |
| Rate                             |           |                    | 100.0%    |                          | 6.1%         |                           | 4.2%          |

‡ - Number of probes tested within each CNV region. Not all CNVs were predicted to contain all tested probes. Three 22q dels and one NRXN1 exonic del were tested with only 1 probe, and one 16p dup with 2 probes.

\* qPCR and Birdseye boundaries differed in 11/12 subjects .

\*\* 13 of the inconsistent results in CNV cases were for the leftmost probe, indicating that Birdseye called a wider CNV than was confirmed.

# - CNVs that were subsequently dropped from analysis after further examination including comparison with other datasets.

CNVs in 13 regions were tested with qPCR as summarized below. Shown are: the number of CNVs predicted and confirmed (with at least one probe, typically with all or almost all probes) in each region (100% confirmation rate); the number of probes predicted to lie within CNVs and the number of qPCR assays that were inconsistent with prediction (6.1%); and the number of individual probe assays tested in controls (20-40 per region) where predicted CN was 2, and the number in which deletion or duplication calls were made by qPCR (4.2% inconsistent with prediction).

Methods summary: In selected regions, copy number was assayed for case and control CNVs by quantitative PCR. In brief, each assay was run as a duplex real-time PCR reaction (10ul), with a FAM-labeled assay for the target sequence and VIC-labeled endogenous control assay (human RNase P). Real-time PCR was performed in 384-well plates on an ABI 7900 instrument. Each sample was assayed with 4 replicates. The relative quantity of target sequence vs. reference probe (VIC-RNase P) in each sample was determined by  $\Delta Ct$  (FAM Ct-VIC Ct). Using median  $\Delta Ct$  value of > 10 samples with predicted CN=2 as two-copy reference genome (or calibrator), we calculated the relative DNA quantity between a sample and the reference (calibrator) as  $\Delta\Delta Ct = [(FAM Ct-VIC Ct)_{sample}] - [(FAM Ct- VIC Ct)_{calibrator}]$ , from which the copy number was estimated with a formula  $2 \times 2^{-\Delta\Delta Ct}$ . (Sharp et al., 2008; Xu et al., 2008) We defined a duplication or deletion when qPCR estimated the CN as >2.5 or <1.5 respectively, based on the distribution of estimated copy numbers from 1224 qPCR data points for reference subjects with predicted CN=2.

Sharp AJ, Mefford HC, Li K, Baker C, Skinner C, Stevenson RE, Schroer RJ, Novara F, De Gregori M, Ciccone R, Broomer A, Casuga I, Wang Y, Xiao C, Barbacioru C, Gimelli G, Bernardina BD, Torniero C, Giorda R, Regan R, Murday V, Mansour S, Fichera M, Castiglia L, Failla P, Ventura M, Jiang Z, Cooper GM, Knight SJ, Romano C, Zuffardi O, Chen C, Schwartz CE, Eichler EE. A recurrent 15q13.3 microdeletion syndrome associated with mental retardation and seizures. *Nat Genet.* 2008 Mar;40(3):322-8. Epub 2008 Feb 17. PubMed PMID: 18278044

Xu B, Roos JL, Levy S, van Rensburg EJ, Gogos JA, Karayiorgou M. Strong association of de novo copy number mutations with sporadic schizophrenia. *Nat Genet.* 2008 Jul;40(7):880-5. Epub 2008 May 30. PubMed PMID: 18511947.

**Table S6: Suggestive point-wise results and comparison with ISC dataset**

| Gene/region              | Chr | Location (bp)           | Effect                 | Best MGS |        | Best ISC |        | Comments                                                                   |
|--------------------------|-----|-------------------------|------------------------|----------|--------|----------|--------|----------------------------------------------------------------------------|
|                          |     |                         |                        | Case     | Cont   | Case     | Cont   |                                                                            |
| <b>MAST2/PIK3R3</b>      | 1   | 46,041,871-46,371,295   | dups                   | 5        | 0      | 0        | 2      | Case:control ratio (dups) 8:1 in MAST2, 4:0 in PIK3R3                      |
| <b>3q26.1 intergenic</b> | 3   | 165,606,061-165,655,524 | all dels               | 5        | 0      | -        | -      | Multiple TFBS including POU2F1 (6-66kb; 1 large ISC case del spans region) |
| <b>3q29 (DLG1/BDH1)</b>  | 3   | 197,203,162-198,825,243 | large dels             | 5        | 0      | 2        | 0      | ~1.6 Mb deletions affecting 21 genes; CHOP: 3 smaller dels in DLG1         |
| ZNF595/ZNF718            | 4   | ~60,000-192,000         | all dels               | 5        | 0      | 6        | 0      | No evidence in ISC for association of exonic CNVs                          |
| PARK2                    | 6   | 161,688,579-163,068,824 | large dels<br>all dups | 8<br>5   | 1<br>0 | 6<br>6   | 1<br>1 | Exonic dups and dels have low ORs in both datasets                         |
| IMMP2L                   | 7   | 110,090,345-110,989,583 | large dels             | 9        | 2      | 4        | 0      | Exonic dels have low ORs in both datasets                                  |
| <b>CNTNAP2</b>           | 7   | 145,444,385-147,749,019 | all dels               | 5        | 0      | 2        | 0      | 7:3 for exonic deletions (MGS+ISC)                                         |
| <b>VIPR2</b>             | 7   | 158,513,626-158,630,410 | large dups             | 7        | 1      | 4        | 0      | MGS and ISC best signals at same location                                  |
| DDX10                    | 11  | 108,041,025-108,316,858 | all dups               | 5        | 0      | 0        | 0      | No signal for exonic dups (2:1)                                            |
| RNASE3                   | 14  | 20,429,401-20,430,347   | all dups               | 9        | 1      | 0        | 0      | Common dels and dups also affect this gene with ORs < 2                    |
| CGNL1                    | 15  | 55,455,996-55,630,213   | large dups             | 11       | 2      | 8        | 2      | Signals in different locations; lower OR for exonic dups in ISC            |
| C16orf72                 | 16  | 9,093,037-9,121,056     | all dups               | 10       | 0      | 1        | 0      | All MGS and ISC dups affect exons                                          |
| NOMO3                    | 16  | 16,233,889-16,296,168   | large dels             | 11       | 3      | 3        | 0      | SDs throughout region; reduced del freq in LCLs                            |
| 16p intergenic           | 16  | ~18,150,000-18,500,00   | large dels             | 9        | 1      | 0        | 3      | Consistency of CNV calls across methods is weaker in this region           |
| WVOX                     | 16  | 76,691,051-77,804,065   | all dups               | 6        | 0      | 0        | 0      | Downstream of gene; multiple TFBS                                          |
| NEDD4L                   | 18  | 53,862,777-54,216,369   | all dups               | 5        | 0      | 2        | 0      | MGS and ISC best signals in different locations                            |
| TEX101                   | 19  | 48,584,602-48,614,607   | all dups               | 5        | 0      | 0        | 0      | All MGS dups affect exons                                                  |

TBFS - transcription factor binding sites; OR - odds ratio

Shown are pointwise results that achieved empirical suggestive genome-wide significance (expected less than once per genome-wide study) in the MGS dataset as computed by PLINK. The same analysis was carried out in the ISC dataset and the best result in each gene or region is shown, but note that (a) only CNVs > 100kb were publicly available for ISC while some of the MGS CNVs were smaller; and (b) the best point was usually not the same in the two datasets. For chromosomal regions, numbers of CHOP subjects with a CNV in that region are shown, whereas for individual genes, CHOP data were included in the analyses of exonic CNVs in the most promising regions (see main text, Table 3). Some of these regions represent additional candidates that deserve exploration in meta-analyses of larger combined datasets.

**Table S7: HG18 locations and descriptions of genes in schizophrenia-associated multigenic CNVs**

| Gene Symbol                                                               | Chr | StartBP   | EndBP     | Description                                                                                                                                   |
|---------------------------------------------------------------------------|-----|-----------|-----------|-----------------------------------------------------------------------------------------------------------------------------------------------|
| <b>MGS CNV candidate genes</b>                                            |     |           |           |                                                                                                                                               |
| VIPR2                                                                     | 7   | 158513626 | 158630410 | vasoactive intestinal peptide receptor 2                                                                                                      |
| CSMD3                                                                     | 8   | 113304332 | 114518418 | CUB and Sushi multiple domains 3                                                                                                              |
| AGTPBP1                                                                   | 9   | 87351273  | 87546764  | ATP/GTP binding protein 1                                                                                                                     |
| GLB1L3                                                                    | 11  | 133651484 | 133694668 | galactosidase, beta 1-like 3                                                                                                                  |
| GLB1L2                                                                    | 11  | 133707018 | 133751428 | galactosidase, beta 1-like 2                                                                                                                  |
| C16orf72                                                                  | 16  | 9093037   | 9121056   | chromosome 16 open reading frame 72                                                                                                           |
| NEDD4L                                                                    | 18  | 53862777  | 54216369  | neural precursor cell expressed, developmentally down-regulated 4-like                                                                        |
| <b>3q29 large deletion candidate region (3q29 microdeletion syndrome)</b> |     |           |           |                                                                                                                                               |
| TFRC                                                                      | 3   | 197260551 | 197293429 | transferrin receptor (p90, CD71)                                                                                                              |
| ZDHH19                                                                    | 3   | 197408719 | 197422697 | zinc finger, DHHC-type containing 19                                                                                                          |
| OSTalpha                                                                  | 3   | 197427779 | 197444698 | organic solute transporter alpha                                                                                                              |
| PCYT1A                                                                    | 3   | 197449649 | 197498981 | phosphate cytidyltransferase 1, choline, alpha                                                                                                |
| TCTEX1D2                                                                  | 3   | 197502494 | 197529542 | Tctex1 domain containing 2                                                                                                                    |
| TM4SF19                                                                   | 3   | 197534815 | 197549655 | transmembrane 4 L six family member 19                                                                                                        |
| UBXD7                                                                     | 3   | 197564765 | 197643742 | UBX domain protein 7                                                                                                                          |
| RNF168                                                                    | 3   | 197683024 | 197714979 | ring finger protein 168                                                                                                                       |
| C3orf43                                                                   | 3   | 197718146 | 197726634 | chromosome 3 open reading frame 43                                                                                                            |
| WDR53                                                                     | 3   | 197765455 | 197779810 | WD repeat domain 53                                                                                                                           |
| FBXO45                                                                    | 3   | 197780121 | 197800327 | F-box protein 45                                                                                                                              |
| LRRC33                                                                    | 3   | 197851052 | 197873271 | leucine rich repeat containing 33                                                                                                             |
| C3orf34                                                                   | 3   | 197917544 | 197923520 | chromosome 3 open reading frame 34                                                                                                            |
| PIGX                                                                      | 3   | 197923642 | 197947273 | phosphatidylinositol glycan anchor biosynthesis, class X                                                                                      |
| PAK2                                                                      | 3   | 197951124 | 198043915 | p21 protein (Cdc42/Rac)-activated kinase 2                                                                                                    |
| SEN5                                                                      | 3   | 198079123 | 198145981 | SUMO1/sentrin specific peptidase 5                                                                                                            |
| NCBP2                                                                     | 3   | 198146669 | 198153861 | nuclear cap binding protein subunit 2, 20kDa                                                                                                  |
| PIGZ                                                                      | 3   | 198157610 | 198180101 | phosphatidylinositol glycan anchor biosynthesis, class Z antigen p97 (melanoma associated) identified by monoclonal antibodies 133.2 and 96.5 |
| MF12                                                                      | 3   | 198214552 | 198241083 |                                                                                                                                               |
| DLG1                                                                      | 3   | 198253827 | 198509844 | discs, large homolog 1 (Drosophila)                                                                                                           |
| BDH1                                                                      | 3   | 198721050 | 198784591 | 3-hydroxybutyrate dehydrogenase, type 1                                                                                                       |
| <b>1q21.1 schizophrenia-associated deletion region</b>                    |     |           |           |                                                                                                                                               |
| FAM108A3                                                                  | 1   | 144786832 | 144791590 | family with sequence similarity 108, member A3                                                                                                |
| PRKAB2                                                                    | 1   | 145093308 | 145110753 | protein kinase, AMP-activated, beta 2 non-catalytic subunit                                                                                   |
| FMO5                                                                      | 1   | 145124461 | 145163546 | flavin containing monooxygenase 5                                                                                                             |
| CHD1L                                                                     | 1   | 145180914 | 145234067 | chromodomain helicase DNA binding protein 1-like                                                                                              |
| BCL9                                                                      | 1   | 145479805 | 145564639 | B-cell CLL/lymphoma 9                                                                                                                         |
| ACP6                                                                      | 1   | 145585791 | 145609258 | acid phosphatase 6, lysophosphatidic                                                                                                          |
| GJA5                                                                      | 1   | 145694955 | 145712108 | gap junction protein, alpha 5, 40kDa                                                                                                          |
| GJA8                                                                      | 1   | 145841559 | 145848017 | gap junction protein, alpha 8, 50kDa                                                                                                          |
| GPR89B                                                                    | 1   | 145867129 | 145932377 | G protein-coupled receptor 89B                                                                                                                |
| GPR89C                                                                    | 1   | 145892190 | 145932379 | G protein-coupled receptor 89C                                                                                                                |
| NBPF11                                                                    | 1   | 146040946 | 146076705 | neuroblastoma breakpoint family, member 11                                                                                                    |
| <b>15q13.3 schizophrenia-associated deletion region</b>                   |     |           |           |                                                                                                                                               |
| CHRFAM7A                                                                  | 15  | 28440734  | 28473156  | CHRNA7 (cholinergic receptor, nicotinic, alpha 7, exons 5-10) and FAM7A (family with sequence similarity 7A, exons A-E) fusion                |
| ARHGAP11B                                                                 | 15  | 28706170  | 28718305  | Rho GTPase activating protein 11B                                                                                                             |
| MTMR15                                                                    | 15  | 28983420  | 29022600  | myotubularin related protein 15                                                                                                               |
| MTMR10                                                                    | 15  | 29018435  | 29071099  | myotubularin related protein 10                                                                                                               |
| TRPM1                                                                     | 15  | 29080842  | 29181216  | transient receptor potential cation channel, subfamily M, member 1                                                                            |
| KLF13                                                                     | 15  | 29406374  | 29457394  | Kruppel-like factor 13                                                                                                                        |
| OTUD7A                                                                    | 15  | 29562620  | 29734834  | OTU domain containing 7A                                                                                                                      |
| CHRNA7                                                                    | 15  | 30110017  | 30248527  | cholinergic receptor, nicotinic, alpha 7                                                                                                      |

**16p11.2 schizophrenia-associated duplication region** (note - 3 genes shaded in gray are duplicated in each flanking SD region)

|          |    |            |            |                                                                                        |
|----------|----|------------|------------|----------------------------------------------------------------------------------------|
| BOLA2    | 16 | 29,362,071 | 29,373,786 | BolA-like protein 2                                                                    |
| GIYD2    | 16 | 29,373,376 | 29,377,041 | GIY-YIG domain containing 2                                                            |
| SULT1A4  | 16 | 29,373,902 | 29,383,783 | sulfotransferase family, cytosolic, 1A, phenol-preferring, member 4                    |
| SPN      | 16 | 29,581,801 | 29,589,329 | sialophorin (leukosialin, CD43)                                                        |
| QPRT     | 16 | 29,597,942 | 29,616,816 | nicotinate-nucleotide pyrophosphorylase (carboxylating)                                |
| C16orf54 | 16 | 29,661,285 | 29,664,841 | chromosome 16 open reading frame 54                                                    |
| KIF22    | 16 | 29,709,559 | 29,724,207 | kinesin family member 22                                                               |
| MAZ      | 16 | 29,725,356 | 29,730,005 | MYC-associated zinc finger protein (purine-binding transcription factor)               |
| PRRT2    | 16 | 29,730,910 | 29,734,703 | proline-rich transmembrane protein 2                                                   |
| MVP      | 16 | 29,731,591 | 29,766,842 | major vault protein                                                                    |
| C16orf53 | 16 | 29,735,029 | 29,741,317 | chromosome 16 open reading frame 53                                                    |
| CDIPT    | 16 | 29,777,179 | 29,782,079 | CDP-diacylglycerol--inositol 3-phosphatidyltransferase (phosphatidylinositol synthase) |
| SEZ6L2   | 16 | 29,790,329 | 29,818,074 | seizure related 6 homolog (mouse)-like 2                                               |
| ASPHD1   | 16 | 29,819,648 | 29,824,878 | aspartate beta-hydroxylase domain containing 1                                         |
| KCTD13   | 16 | 29,825,164 | 29,845,046 | potassium channel tetramerisation domain containing 13                                 |
| TMEM219  | 16 | 29,880,852 | 29,891,874 | transmembrane protein 219                                                              |
| TAOK2    | 16 | 29,892,723 | 29,911,082 | TAO kinase 2                                                                           |
| HIRIP3   | 16 | 29,911,817 | 29,914,888 | HIRA interacting protein 3                                                             |
| INO80E   | 16 | 29,915,032 | 29,924,613 | coiled-coil domain containing 95                                                       |
| DOC2A    | 16 | 29,924,336 | 29,929,902 | double C2-like domains, alpha                                                          |
| C16orf92 | 16 | 29,942,156 | 29,943,524 | chromosome 16 open reading frame 92                                                    |
| FAM57B   | 16 | 29,943,249 | 29,949,687 | family with sequence similarity 57, member B                                           |
| ALDOA    | 16 | 29,971,992 | 29,989,236 | aldolase A, fructose-bisphosphate                                                      |
| PPP4C    | 16 | 29,994,886 | 30,004,196 | protein phosphatase 4 (formerly X), catalytic subunit                                  |
| TBX6     | 16 | 30,004,583 | 30,010,709 | T-box 6                                                                                |
| YPEL3    | 16 | 30,011,136 | 30,015,022 | yippee-like 3 (Drosophila)                                                             |
| GDPD3    | 16 | 30,023,632 | 30,032,379 | glycerophosphodiester phosphodiesterase domain containing 3                            |
| MAPK3    | 16 | 30,032,927 | 30,042,131 | mitogen-activated protein kinase 3                                                     |
| CORO1A   | 16 | 30,102,427 | 30,107,898 | coronin, actin binding protein, 1A                                                     |
| BOLA2B   | 16 | 30,111,757 | 30,113,128 | bolA homolog 2B (E. coli)                                                              |
| GIYD1    | 16 | 30,112,718 | 30,116,383 | GIY-YIG domain containing 1                                                            |
| SULT1A3  | 16 | 30,113,244 | 30,123,151 | sulfotransferase family, cytosolic, 1A, phenol-preferring, member 3                    |

**22q11.21 schizophrenia-associated deletion region**

|          |    |          |          |                                                                                 |
|----------|----|----------|----------|---------------------------------------------------------------------------------|
| DGCR6    | 22 | 17273735 | 17279601 | DiGeorge syndrome critical region gene 6                                        |
| PRODH    | 22 | 17280293 | 17303814 | proline dehydrogenase (oxidase) 1                                               |
| DGCR2    | 22 | 17403794 | 17489967 | DiGeorge syndrome critical region gene 2                                        |
| DGCR14   | 22 | 17497791 | 17512190 | DiGeorge syndrome critical region gene 14                                       |
| TSSK2    | 22 | 17498320 | 17500136 | testis-specific serine kinase 2                                                 |
| GSC2     | 22 | 17516503 | 17517796 | gooseoid homeobox 2                                                             |
| SLC25A1  | 22 | 17543094 | 17546285 | solute carrier family 25 (mitochondrial carrier; citrate transporter), member 1 |
| CLTCL1   | 22 | 17546986 | 17659239 | clathrin, heavy chain-like 1                                                    |
| HIRA     | 22 | 17698223 | 17799219 | HIR histone cell cycle regulation defective homolog A (S. cerevisiae)           |
| MRPL40   | 22 | 17800035 | 17803596 | mitochondrial ribosomal protein L40                                             |
| C22orf39 | 22 | 17810894 | 17815220 | chromosome 22 open reading frame 39                                             |
| UFD1L    | 22 | 17817700 | 17846726 | ubiquitin fusion degradation 1 like (yeast)                                     |
| CDC45L   | 22 | 17847415 | 17888135 | CDC45 cell division cycle 45-like (S. cerevisiae)                               |
| CLDN5    | 22 | 17890549 | 17892860 | claudin 5                                                                       |
| SEPT5    | 22 | 18081986 | 18092297 | septin 5                                                                        |
| GP1BB    | 22 | 18091065 | 18092297 | glycoprotein Ib (platelet), beta polypeptide                                    |
| TBX1     | 22 | 18124225 | 18151112 | T-box 1                                                                         |
| GNB1L    | 22 | 18155933 | 18222462 | guanine nucleotide binding protein (G protein), beta polypeptide 1-like         |
| C22orf29 | 22 | 18213660 | 18222371 | chromosome 22 open reading frame 29                                             |
| TXNRD2   | 22 | 18243039 | 18309359 | thioredoxin reductase 2                                                         |
| COMT     | 22 | 18309308 | 18336530 | catechol-O-methyltransferase                                                    |
| ARVCF    | 22 | 18337418 | 18384309 | armadillo repeat gene deleted in velocardiofacial syndrome                      |
| C22orf25 | 22 | 18388630 | 18433447 | chromosome 22 open reading frame 25                                             |

|          |    |          |          |                                                                                   |
|----------|----|----------|----------|-----------------------------------------------------------------------------------|
| DGCR8    | 22 | 18447833 | 18479400 | DiGeorge syndrome critical region gene 8                                          |
| HTF9C    | 22 | 18479397 | 18484768 | TRM2 tRNA methyltransferase 2 homolog A ( <i>S. cerevisiae</i> ) (formerly HTF9C) |
| RANBP1   | 22 | 18485023 | 18494704 | RAN binding protein 1                                                             |
| ZDHC8    | 22 | 18499364 | 18513974 | zinc finger, DHHC-type containing 8                                               |
| RTN4R    | 22 | 18608937 | 18635816 | reticulon 4 receptor                                                              |
| DGCR6L   | 22 | 18681799 | 18687608 | DiGeorge syndrome critical region gene 6-like                                     |
| RIMBP3   | 22 | 18835993 | 18841786 | RIMS binding protein 3                                                            |
| ZNF74    | 22 | 19078479 | 19092752 | zinc finger protein 74                                                            |
| SCARF2   | 22 | 19108874 | 19122146 | scavenger receptor class F, member 2                                              |
| KLHL22   | 22 | 19125805 | 19180122 | kelch-like 22 ( <i>Drosophila</i> )                                               |
| MED15    | 22 | 19191885 | 19271919 | mediator complex subunit 15                                                       |
| PI4KA    | 22 | 19391978 | 19543070 | phosphatidylinositol 4-kinase, catalytic, alpha                                   |
| SERPIND1 | 22 | 19458382 | 19472008 | serpin peptidase inhibitor, clade D (heparin cofactor), member 1                  |
| SNAP29   | 22 | 19543291 | 19574109 | synaptosomal-associated protein, 29kDa                                            |
| CRKL     | 22 | 19601713 | 19637890 | v-crk sarcoma virus CT10 oncogene homolog (avian)-like                            |
| AIFM3    | 22 | 19649433 | 19665649 | apoptosis-inducing factor, mitochondrion-associated, 3                            |
| LZTR1    | 22 | 19666557 | 19683326 | leucine-zipper-like transcription regulator 1                                     |
| THAP7    | 22 | 19684060 | 19686404 | THAP domain containing 7                                                          |
| P2RX6    | 22 | 19699463 | 19712302 | purinergic receptor P2X, ligand-gated ion channel, 6                              |
| SLC7A4   | 22 | 19713006 | 19716847 | solute carrier family 7 (cationic amino acid transporter, y+ system), member 4    |
| RIMBP3C  | 22 | 20067662 | 20073455 | RIMS binding protein 3C                                                           |
| RIMBP3B  | 22 | 20068039 | 20073455 | RIMS binding protein 3B                                                           |
| HIC2     | 22 | 20101692 | 20135750 | hypermethylated in cancer 2                                                       |

**Table S8: Case-control analysis of exonic CNVs:  
Genes with genome-wide suggestive significance in the MGS sample**

| DELETIONS |          |           |           |     |    |        |        | DUPLICATIONS |          |             |             |     |    |        |        |
|-----------|----------|-----------|-----------|-----|----|--------|--------|--------------|----------|-------------|-------------|-----|----|--------|--------|
| CHR       | GENE     | BP1       | BP2       | AFF | UN | EMP1   | EMP2   | CHR          | GENE     | BP1         | BP2         | AFF | UN | EMP1   | EMP2   |
| 11        | GLB1L3   | 133651484 | 133694668 | 15  | 3  | 0.0058 | 0.6486 | 19           | ZNF600   | 57960559    | 57981846    | 5   | 0  | 0.0384 | 0.9990 |
| 2         | NRXN1    | 50000991  | 51113178  | 10  | 1  | 0.0089 | 0.7137 | 9            | ZNF658B  | 41578832    | 41582207    | 5   | 0  | 0.0402 | 0.9990 |
| 11        | GLB1L2   | 133707018 | 133751428 | 14  | 3  | 0.0103 | 0.8517 | 1            | C1orf25* | 183,353,840 | 183,392,739 | 15  | 3  | 0.0057 | 0.6875 |
| 3         | BDH1     | 198721050 | 198784591 | 8   | 1  | 0.0259 | 0.9878 | 1            | C1orf26* | 183,392,913 | 183,527,536 | 15  | 3  | 0.0057 | 0.6875 |
| 2         | VWA3B    | 98070026  | 98295842  | 16  | 5  | 0.0222 | 0.9889 | 1            | OR2T12   | 246,524,540 | 246,525,503 | 10  | 1  | 0.0093 | 0.7507 |
| 3         | TFRC     | 197260551 | 197293429 | 5   | 0  | 0.0380 | 0.9990 | 1            | OR2M7    | 246,553,554 | 246,554,493 | 10  | 1  | 0.0093 | 0.7507 |
| 3         | ZDHHC19  | 197408719 | 197422697 | 5   | 0  | 0.0380 | 0.9990 | 2            | RBM44    | 238,372,126 | 238,408,253 | 6   | 0  | 0.0208 | 0.9828 |
| 3         | OSTalpha | 197427779 | 197444698 | 5   | 0  | 0.0380 | 0.9990 | 2            | RAMP1    | 238,432,925 | 238,485,494 | 6   | 0  | 0.0208 | 0.9828 |
| 3         | PCYT1A   | 197449649 | 197498981 | 5   | 0  | 0.0380 | 0.9990 | 15           | CGNL1    | 55,455,996  | 55,630,213  | 11  | 2  | 0.0156 | 0.9851 |
| 3         | TCTEX1D2 | 197502494 | 197529542 | 5   | 0  | 0.0380 | 0.9990 | 1            | MAST2    | 46,041,871  | 46,274,383  | 8   | 1  | 0.0256 | 0.9955 |
| 3         | TM4SF19  | 197534815 | 197549655 | 5   | 0  | 0.0380 | 0.9990 | 9            | GLDC     | 6,522,463   | 6,635,692   | 8   | 1  | 0.0258 | 0.9955 |
| 3         | UBXD7    | 197564765 | 197643742 | 5   | 0  | 0.0380 | 0.9990 | 7            | VIPR2    | 158,513,626 | 158,630,410 | 10  | 2  | 0.0260 | 0.9977 |
| 3         | RNF168   | 197683024 | 197714979 | 5   | 0  | 0.0380 | 0.9990 | 21           | BAGE2    | 10,042,712  | 10,120,796  | 10  | 2  | 0.0273 | 0.9977 |
| 3         | C3orf43  | 197718146 | 197726634 | 5   | 0  | 0.0380 | 0.9990 | 1            | OR2T33   | 246,502,776 | 246,503,739 | 10  | 2  | 0.0275 | 0.9977 |
| 3         | WDR53    | 197765455 | 197779810 | 5   | 0  | 0.0380 | 0.9990 | 5            | BTNL3    | 180,348,506 | 180,366,333 | 12  | 3  | 0.0271 | 0.9980 |
| 3         | FBXO45   | 197780121 | 197800327 | 5   | 0  | 0.0380 | 0.9990 | 9            | AGTPBP1  | 87,351,273  | 87,546,764  | 5   | 0  | 0.0390 | 1.0000 |
| 3         | LRRC33   | 197851052 | 197873271 | 5   | 0  | 0.0380 | 0.9990 | 8            | CSMD3**  | 113,304,332 | 114,518,418 | 5   | 0  | 0.0390 | 1.0000 |
| 3         | C3orf34  | 197917544 | 197923520 | 5   | 0  | 0.0380 | 0.9990 |              |          |             |             |     |    |        |        |
| 3         | PIGX     | 197923642 | 197947273 | 5   | 0  | 0.0380 | 0.9990 |              |          |             |             |     |    |        |        |
| 3         | PAK2     | 197951124 | 198043915 | 5   | 0  | 0.0380 | 0.9990 |              |          |             |             |     |    |        |        |
| 3         | SENP5    | 198079123 | 198145981 | 5   | 0  | 0.0380 | 0.9990 |              |          |             |             |     |    |        |        |
| 3         | NCBP2    | 198146669 | 198153861 | 5   | 0  | 0.0380 | 0.9990 |              |          |             |             |     |    |        |        |
| 3         | PIGZ     | 198157610 | 198180101 | 5   | 0  | 0.0380 | 0.9990 |              |          |             |             |     |    |        |        |
| 3         | MF12     | 198230220 | 198241083 | 5   | 0  | 0.0380 | 0.9990 |              |          |             |             |     |    |        |        |

\* 23:11 for Broad CNV calls.

\*\* 9:3 for Broad CNV calls.

Shown are the results of case-control association analysis of CNVs affecting exons in RefSeq genes. Locations of genes and of exons within genes were based on HG18 download files. The PennCNV utility script "scan\_region.pl" was used to identify MGS CNVs (from the post-QC file of Narrow-criteria CNVs of all frequencies) that overlapped with any exon.

After excluding non-exonic CNVs, gene-wise case-control analysis was then carried out with PLINK, which computed two empirical p-values for each gene based on 10,000 permutations of case-control status. Genes with deletions or duplications in > 0.5% of all subjects were excluded. EMP1 is a pointwise p-value (how often would this case-control ratio be observed at this location), and EMP2 is a genome-wide p-value (how often would a case-control ratio this extreme be observed anywhere in the genome).

All genes with EMP2<1 (expected less than once per genome-wide analysis) are shown in the table. The shaded rows are the 21 genes in the 3q29 microdeletion region. Genes whose association with schizophrenia was supported after inclusion of ISC and CHOP data are shown in Table 3 in the main text. Some loci were excluded from consideration because of much weaker results using Broad calls or significant differences between cell line vs. blood DNA in cases.

**Table S9: Analyses of number of genome-wide CNVs per subject (“global burden”)**

**a. Deletions**

| Type of Deletion                  | Type of CNV     | Tested effect   | All (<1%)      |          | Cell line DNA only |          | Singleton CNVs |          | >500kb CNVs |                | >1Mb CNVs       |          |
|-----------------------------------|-----------------|-----------------|----------------|----------|--------------------|----------|----------------|----------|-------------|----------------|-----------------|----------|
|                                   |                 |                 | Cases          | Controls | Cases              | Controls | Cases          | Controls | Cases       | Controls       | Cases           | Controls |
| Large (>100kb or larger as shown) | All             | CNVs/subject    | 0.535          | 0.512    | 0.537              | 0.511    | 0.118          | 0.107    | 0.061       | 0.069          | 0.020           | 0.019    |
|                                   |                 | Subjects w. CNV | 0.402          | 0.397    | 0.405              | 0.397    | 0.109          | 0.101    | 0.058       | 0.065          | 0.020           | 0.019    |
|                                   | Gene-containing | Genes/CNV       | <b>0.628*</b>  | 0.531    | <b>0.630*</b>      | 0.524    | 0.028          | 0.024    | 0.221       | 0.180          | <b>0.137*</b>   | 0.070    |
|                                   |                 | Prop genic CNVs | <b>0.225*</b>  | 0.20     | <b>0.228*</b>      | 0.205    | 0.027          | 0.024    | 0.038       | 0.041          | <b>0.0124*</b>  | 0.0083   |
|                                   |                 | Genes/CNV kb    | <b>0.0048*</b> | 0.0042   | <b>0.0048**</b>    | 0.0042   | 0.0015         | 0.0014   | 0.0033      | 0.0031         | <b>0.0043**</b> | 0.002    |
|                                   | Exon-containing | CNVs/subject    | <b>0.304*</b>  | 0.282    | 0.303              | 0.281    | <b>0.075*</b>  | 0.063    | 0.049       | 0.054          | 0.013           | 0.009    |
| Subject w. CNV                    |                 | 0.255           | 0.243          | 0.259    | 0.242              | 0.069    | 0.061          | 0.046    | 0.052       | <b>0.0129*</b> | 0.0086          |          |
| Small (<100kb)                    | All             | CNVs/subject    | 4.281          | 4.215    | <b>4.326*</b>      | 4.216    | 0.907          | 0.883    |             |                |                 |          |
|                                   |                 | Subject w. CNV  | 0.962          | 0.959    | 0.962              | 0.959    | 0.577          | 0.574    |             |                |                 |          |
|                                   | Gene-containing | Genes/CNV       | 1.381          | 1.367    | 1.383              | 1.365    | 0.273          | 0.278    |             |                |                 |          |
|                                   |                 | Prop genic CNVs | 0.690          | 0.688    | 0.690              | 0.688    | 0.235          | 0.235    |             |                |                 |          |
|                                   |                 | Genes/CNV kb    | 0.026          | 0.030    | 0.026              | 0.030    | 0.054          | 0.048    |             |                |                 |          |
|                                   | Exon-containing | CNVs/subject    | 0.630          | 0.630    | 0.625              | 0.627    | 0.190          | 0.188    |             |                |                 |          |
| Subjects w. CNV                   |                 | 0.467           | 0.457          | 0.462    | 0.456              | 0.171    | 0.168          |          |             |                |                 |          |

**b. Duplications**

| Type of Duplication               | Type of CNV     | Tested effect | All (<1%) |          | Cell line DNA only |          | Singleton CNVs |          | >500kb CNVs |          | >1Mb CNVs |          |
|-----------------------------------|-----------------|---------------|-----------|----------|--------------------|----------|----------------|----------|-------------|----------|-----------|----------|
|                                   |                 |               | Cases     | Controls | Cases              | Controls | Cases          | Controls | Cases       | Controls | Cases     | Controls |
| Large (>100kb or larger as shown) | All             | CNVs/subj     | 0.658     | 0.626    | 0.648              | 0.626    | 0.155          | 0.146    | 0.110       | 0.102    | 0.027     | 0.032    |
|                                   |                 | Subjs w CNV   | 0.469     | 0.444    | 0.463              | 0.444    | 0.137          | 0.129    | 0.103       | 0.096    | 0.026     | 0.030    |
|                                   | Exon-containing | CNVs/subj     | 0.505     | 0.479    | 0.499              | 0.479    | 0.117          | 0.113    | 0.091       | 0.088    | 0.022     | 0.028    |
|                                   |                 | Subjs w CNV   | 0.387     | 0.369    | 0.381              | 0.369    | 0.108          | 0.103    | 0.086       | 0.084    | 0.022     | 0.027    |
| Small (<100kb)                    | All             | CNVs/subj     | 1.152     | 1.135    | 1.145              | 1.134    | 0.338          | 0.325    |             |          |           |          |
|                                   |                 | Subjs w CNV   | 0.675     | 0.664    | 0.671              | 0.663    | 0.282          | 0.270    |             |          |           |          |
|                                   | Exon-containing | CNVs/subj     | 0.467     | 0.475    | 0.478              | 0.474    | 0.147          | 0.140    |             |          |           |          |
|                                   |                 | Subjs w CNV   | 0.365     | 0.378    | 0.369              | 0.377    | 0.134          | 0.132    |             |          |           |          |

\* empirical P < 0.05; \*\* empirical P < 0.01 (uncorrected p-values)

Shown are results of analyses of the overall frequency of deletions and of duplications in cases vs. controls, separately for larger and smaller (<100kb) CNVs; and for all CNVs, those overlapping with at least one gene (for deletions), and those overlapping with at least one exon. CNVs observed in > 1% of subjects were excluded. Separate analyses considered all deletions; and deletions greater than 500 kb or 1 Mb in length. Because lymphoblastic cell line transformation can create structural variants, we also separately analyzed cases vs. controls with DNA extracted from cell lines. All analyses excluded the five associated CNVs shown in Table 2, and CNVs longer than 4 Mb (which were observed primarily in specimens from cell lines, and may represent artifacts). Note that cases did not have significantly larger CNVs than controls. **Case-control differences were for large deletions, for which no difference was observed between LCL and blood DNAs (Table S4b).**



**Table S9c: Global analyses of Narrow large deletions in EA and AA subsamples**

|               | EA narrow large dels |        |        | AA narrow large dels |        |        |
|---------------|----------------------|--------|--------|----------------------|--------|--------|
|               | EMP1                 | AFF    | UNAFF  | EMP1                 | AFF    | UNAFF  |
| <b>N CNVs</b> |                      | 1401   | 1367   |                      | 708    | 480    |
| <b>RATE</b>   | 0.3544               | 0.525  | 0.516  | 0.0429               | 0.556  | 0.499  |
| <b>PROP</b>   | 0.7543               | 0.395  | 0.403  | 0.0468               | 0.416  | 0.380  |
| <b>KBTOT</b>  | 0.5869               | 383.8  | 388    | 0.5878               | 354.8  | 360.4  |
| <b>KBAVG</b>  | 0.8530               | 284.3  | 299.4  | 0.8016               | 260    | 273.9  |
| <b>GRATE</b>  | 0.0520               | 0.656  | 0.568  | 0.0601               | 0.569  | 0.430  |
| <b>GPROP</b>  | 0.0881               | 0.233  | 0.217  | 0.0299               | 0.209  | 0.176  |
| <b>GRICH</b>  | 0.0167               | 0.0051 | 0.0044 | 0.0395               | 0.0043 | 0.0036 |

RATE=CNVs/subject; PROP=proportion of subjects with at least 1 CNV; KBTOT = kb of CNV/subject; KBAVG = mean CNV size; GRATE = number of genes spanned per CNV; GPROP = proportion of CNVs with at least one gene; GRICH = number of genes per total CNV kb.

Separate analysis of EA and AA subsamples show that the direction of effects for genic CNVs was similar in the EA and AA subsamples, although AA cases showed an overall increase in CNVs while for EA cases the effect was limited to genic CNVs. All of these effects are small and some could be due to chance. The increase in the proportion of CNVs spanning at least one gene was 1.07 for EA and 1.19 for AA cases.

## **Supplementary Methods: Estimating genome-wide significant and suggestive thresholds for rare CNVs**

There is no generally-accepted threshold of statistical significance for genome-wide CNV studies. Reasonable estimates of genome-wide thresholds have been made for genome-wide linkage studies based on the structure of recombination in the genome (1) and for genome-wide association studies of **common** SNPs based on their linkage disequilibrium structure.(2-4) But for rare CNVs, individual events cannot be easily collapsed into a set of discrete categories: in some regions there are multiple individuals with CNVs with nearly identical boundaries, but in other regions there are multiple subsets of partially-overlapping and non-overlapping CNVs with diverse lengths and boundaries (whether in the same gene or affecting different sets of genes) which makes counting the “number of tests” difficult; and there is no straightforward correlational structure for estimating the burden of multiple testing. Further, GWAS arrays imperfectly measure the boundaries of rare CNVs.

Within a single dataset such as MGS, some estimates can be made empirically, by re-computing association statistics for all events after randomly permuting case-control status many times. PLINK does this for the pointwise and gene-based analyses used here. The *pointwise* statistic is based on the numbers of cases and controls whose deletions or duplications overlap each of a set of points that include the start and end positions of all CNVs in the dataset, and 1 bp beyond each stop position. The pointwise statistic is useful for identifying regions of interest, but does not identify “CNVs” as such (i.e., categorical classes of events), because CNVs with diverse lengths and which span diverse genomic features can overlap with the same point. The *gene-based* analysis is useful for regions (like NRXN1) where all or most CNVs affect a specific gene or set of genes. But in some regions with long, multigenic CNVs, shorter CNVs affect some of the genes, and thus a set of gene-based tests does not include a specific test of, for example, “15q13.3 deletions that span a specific 1.5 Mb region”, which turns out to be the class of interest. Such events have been identified essentially by inspection of complex data, with subsequent confirmation of the hypothesis. Another problem with empirical p-values is that when one combines data from multiple studies for specific CNVs of interest, one generally lacks comparable genome-wide data across studies (i.e., genome-wide results are often not available, and when they are, there are still many methodological differences between the CNV datasets).

While we have no ideal solution to this problem, we have applied a rather tentative but pragmatic approach to the estimation of thresholds for genome-wide significant association and for suggestive evidence for association (expected once per genome-wide study (1)), as guidelines for interpretation of our results.

To review the procedure for which we wish to define thresholds:

We initially searched for regions of interest with PLINK’s pointwise tests, using uncorrected empirical genome-wide p-values to select regions with  $P < 1$  (suggestive association). This is a liberal criterion, because we did this for deletions and duplications separately, and for all detected CNVs and then for CNVs  $> 100\text{kb}$  (“large”) within each type. However, single datasets cannot provide definitive results for most rare CNVs, so we err on the side of more liberal “suggestive” criteria to identify the best-supported candidate CNVs for testing in other datasets.

We then examined the regions with suggestive findings to identify (i) sets of CNVs that fit the criteria established by previous findings (i.e., the 5 regions shown in Table 3); and (ii) any class of CNVs (such as long, multigenic CNVs) that were present in regions with suggestive

results for one or more points. We computed pooled Fisher's exact tests and stratified CMH exact for these sets of CNVs in the MGS dataset, and then after adding any additional available data.

Finally, we selected exonic CNVs with a frequency of <0.5% (with no size restriction) and carried out PLINK's gene-based analysis, separately for deletions and for duplications, for "CNVs that overlap to any degree with any exon in gene 1, 2, 3..." We then used uncorrected genome-wide empirical  $p < 1$  to select genes of interest, and computed Fisher's exact tests in all available data for exonic CNVs in those genes (Table 2). Again, the uncorrected empirical  $p$ -values were used to avoid prematurely rejecting hypotheses that deserve testing in larger datasets.

What are reasonable significant and suggestive thresholds for the Fisher's exact tests of data from several datasets? To obtain a rough estimate, we applied the "--segment-group" command in PLINK to our files of rare, exonic deletions and duplications. This command "takes all segments in a given region (whole genome unless otherwise specified) and forms 'pools' of overlapping segments. Several pools of overlapping segments will be created; these will be listed in order of decreasing size (number of segments); note that the same segment can appear in multiple pools (e.g. if A overlaps with C, and B overlaps with C, but A and B do not overlap)." (PLINK manual, <http://pngu.mgh.harvard.edu/~purcell/plink/cnv.shtml>) We reasoned that this count would roughly correspond to the number of groupings that might attract our attention when analyzing and reviewing data as described above, although it will overestimate the count in one respect (i.e., smaller pools cannot yield genome-wide suggestive results even if only cases are affected) and underestimate it in other respects (i.e., for longer genes, CNVs of interest, such as exonic CNVs, will not all overlap; and the groupings do not always define the precise set of CNVs that prove to be of interest, such as "1.5 Mb 15q13.3 deletions", so that there is additional "testing" involved in manually reviewing the data to look for those subsets).

For CNVs of all sizes (by our Narrow criteria), we observed 2,317 "pools" (1,006 for deletions and 1,311 for duplications), or 846 after omitting those with less than 5 CNVs in the pool (which is the lowest frequency that we analyzed). For large CNVs, there were 974 pools (280 for deletions and 694 for duplications), or 374 with 5 or more CNVs. Thus if we consider these analyses to be completely independent (which they are not), we would count 1220 pools. In gene-wise analyses of exonic CNVs with <0.5% frequency, but at least 5 carriers, there were 395 genes that met these criteria for deletions and 665 for duplications, for a total of 1060 analyses, but on average each CNV in this set affected 2.1 genes, for an estimate of 500 independent gene-based tests. Thus there were approximately 1720 analyses, which we round up to 2000 to account for the less formal process of reviewing results for subsets of interest. Dividing 1 (the expectation of observing a finding only once per genome scan) by 2000 gives a **rough threshold of  $p=0.0005$  for suggestive evidence for association.**

For a more stringent threshold for **genome-wide significant association**, we divide  $p=0.05$  by 2000 as computed above, which gives a threshold of  $2.5 \times 10^{-5}$ . Whereas we prefer not to over-correct the suggestive threshold, here it might be preferable to be more conservative by assuming that additional correction is required for the informal process of searching for subsets of CNVs within interesting regions. We therefore apply a **threshold of roughly  $10^{-5}$  for significant association.**

We consider these thresholds as guidelines for the present study (note that the number of pools will differ according to the criteria for calling CNVs and the method used to group them), and we do not apply them strictly, but we comment in the text that  $p$ -values for the bolded results shown in Table 3 for deletions in 1q21.1, 15q13.3 and 22q11.21, exonic deletions in NRXN1 and

duplications in 16p11.2 are multiple orders of magnitude lower than this estimated threshold, providing some degree of confidence that they should be considered genome-wide significant.

1. Lander E, Kruglyak L: Genetic dissection of complex traits: guidelines for interpreting and reporting linkage results. *Nat. Genet.* 1995; 11(3):241-247
2. Dudbridge F, Gusnanto A: Estimation of significance thresholds for genomewide association scans. *Genet Epidemiol* 2008; 32(3):227-34
3. Hoggart CJ, Clark TG, De Iorio M, Whittaker JC, Balding DJ: Genome-wide significance for dense SNP and resequencing data. *Genet Epidemiol* 2008; 32(2):179-85
4. Pe'er I, Yelensky R, Altshuler D, Daly MJ: Estimation of the multiple testing burden for genomewide association studies of nearly all common variants. *Genet Epidemiol* 2008; 32(4):381-5

**Figure S1**  
**Plots of CNVs (1q21.1, NRXN1, 15q13.3, 16p11.2, 22q11.21 and VIPR2)**

Shown below are plots of CNVs of MGS subjects for CNVs described in Table 3 plus VIPR2 (Figure 1 in the main text shows 3q29 CNVs). In each plot, the location of the CNV boundaries as called by Birdseye, the Birdseye lod score and copy number are shown at the top.

X-axis values are bp locations. Y-axis values are the log [R] ratio, which is the normalized intensity ratio described below -- values of -1.0, -0.5, 0, 0.5 and 1 represent copy numbers of 0, 2, 2, 3 and 4 respectively.

Each individual black dot represents the mean of the fluorescent intensity of all probes for a chromosomal location (8 probes for each SNP - 4 for each allele; and 4 for each monomorphic copy number probe on the Affymetrix 6.0 array), divided by the mean intensity for all specimens on the same DNA plate (which are typically assayed on the same day and thus share small technical variations which influence intensity values).

Blue vertical lines represent the CNV boundaries assigned by Birdseye. The red dots (which look like red lines) are the point-by-point copy number estimates made by an alternative algorithm (Lai et al., ref. 15 in the paper). Usually the two algorithms agree, but in some cases (particularly in segments with few SNPs, generally segmental duplication regions where SNPs are difficult to design) they differ in placement of boundaries.

The plots illustrate that these CNVs are well-supported by the intensity data. They also illustrate that the background variation in intensity (noise) is greater than the typical shift in intensity for CN=1 (signal), which is likely to account for much of the differences between calling algorithms as well as for discordancies between duplicate assays (see text).

(1) Long deletions and duplications in chromosome 1q21.1

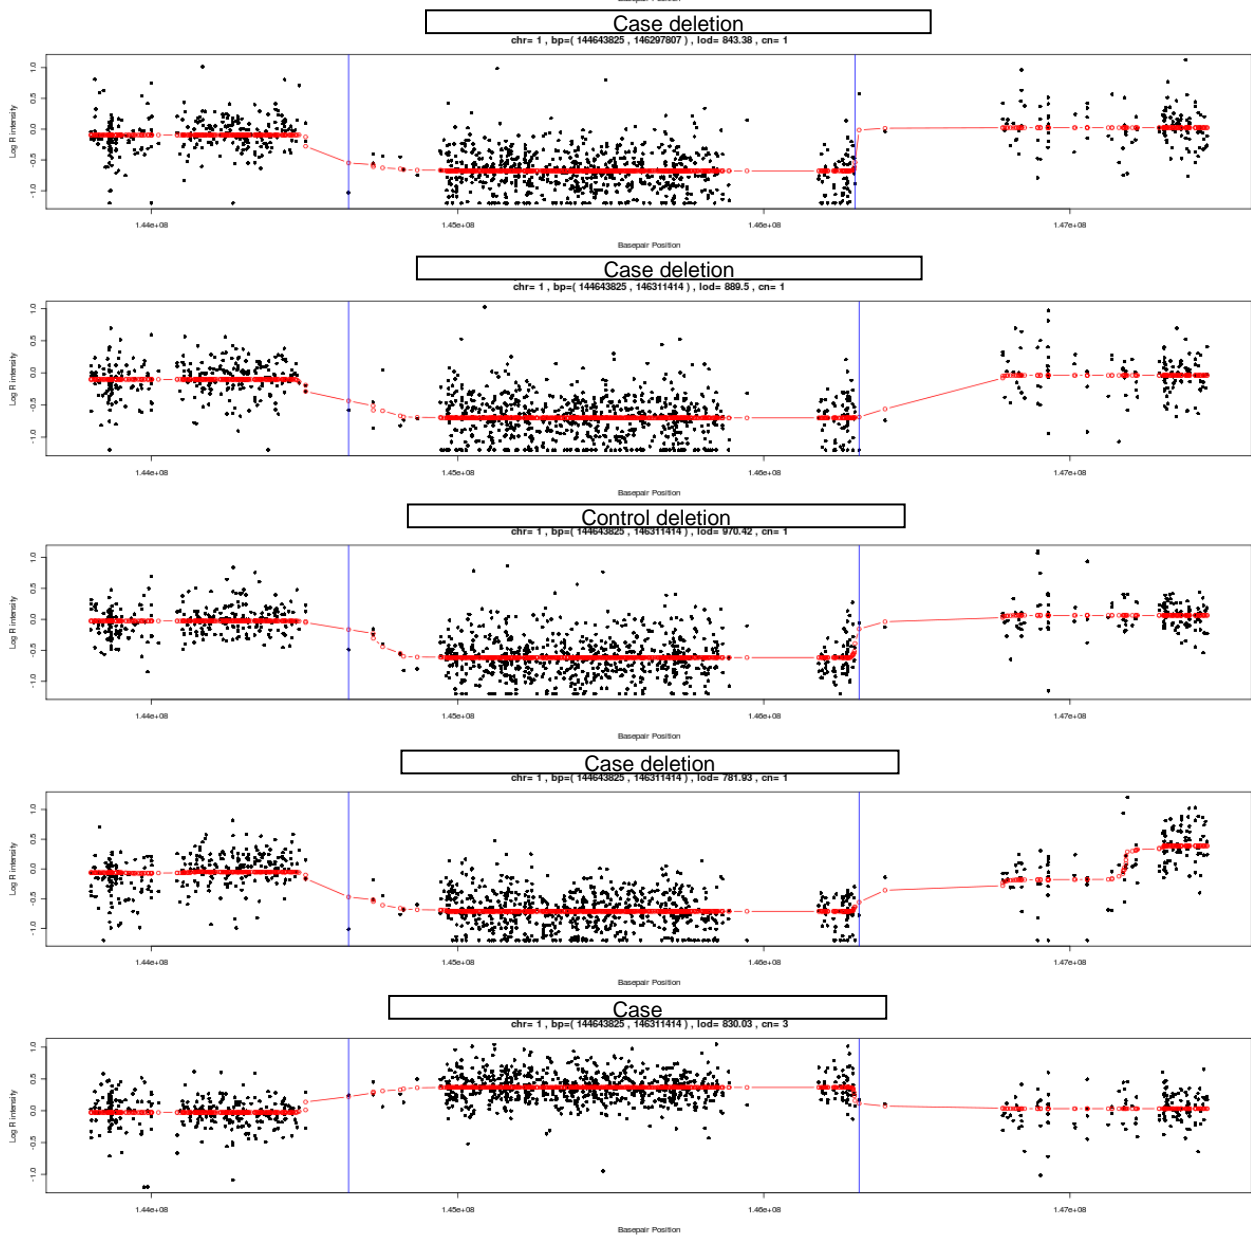

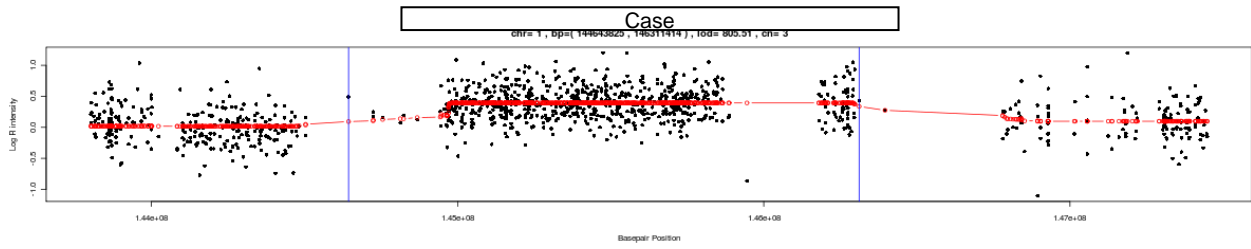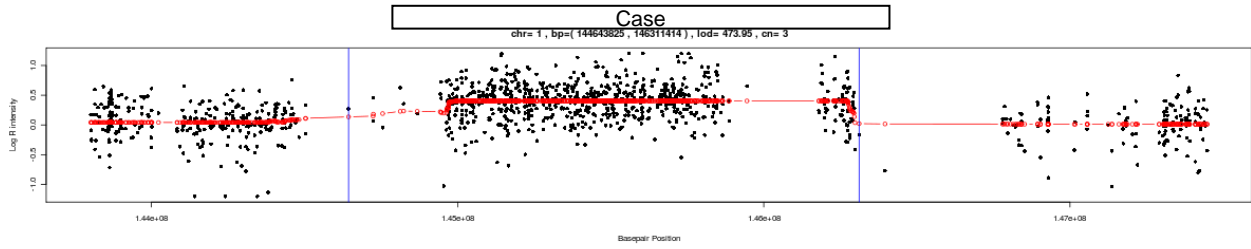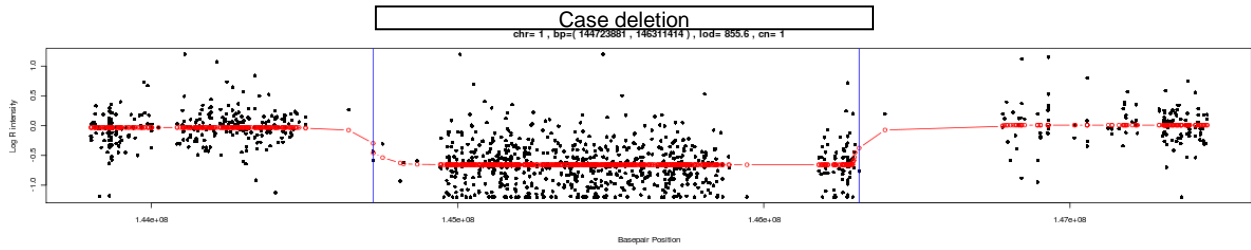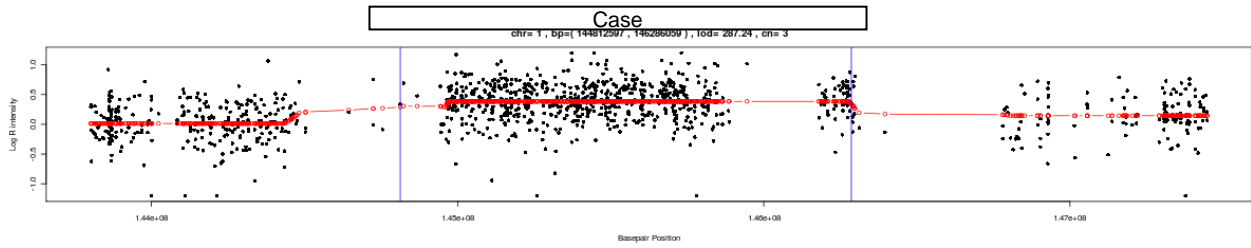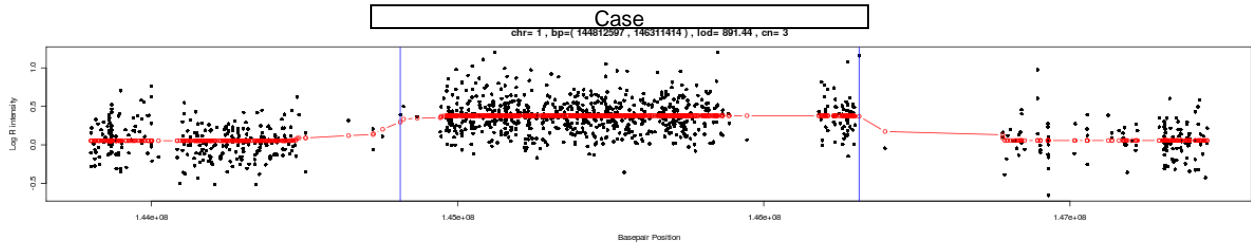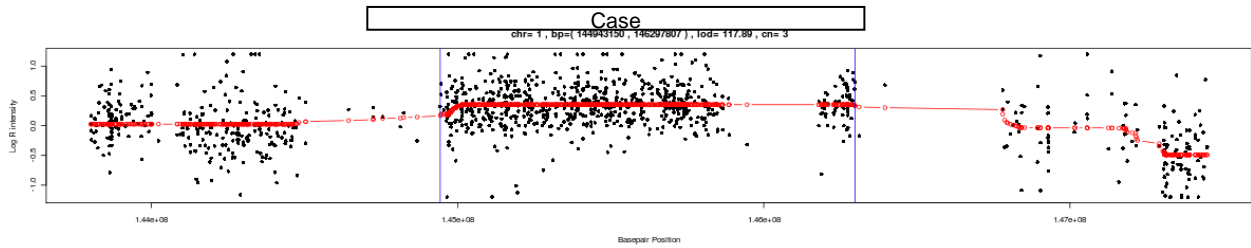

## (2) Exonic deletions in NRXN1

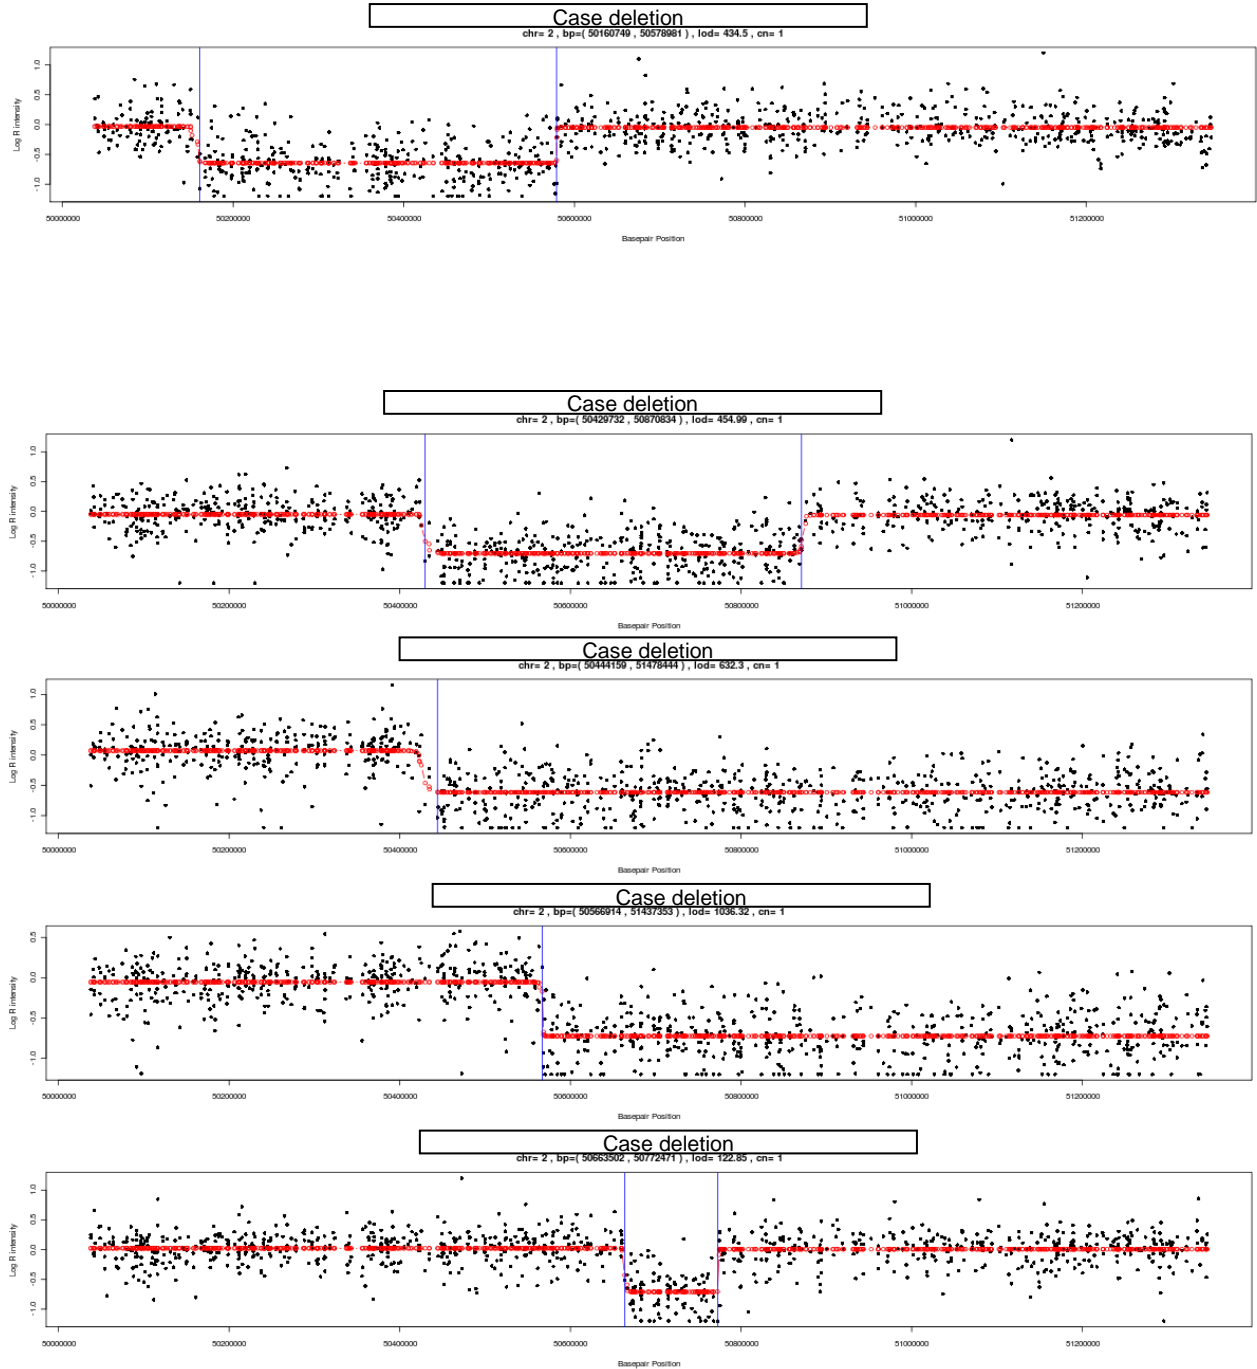



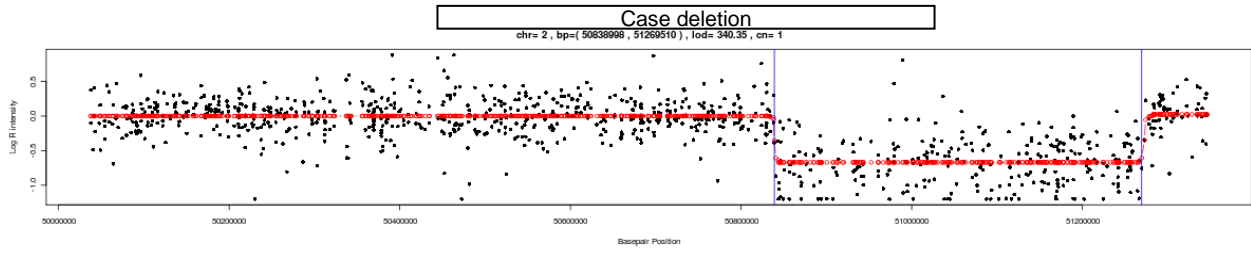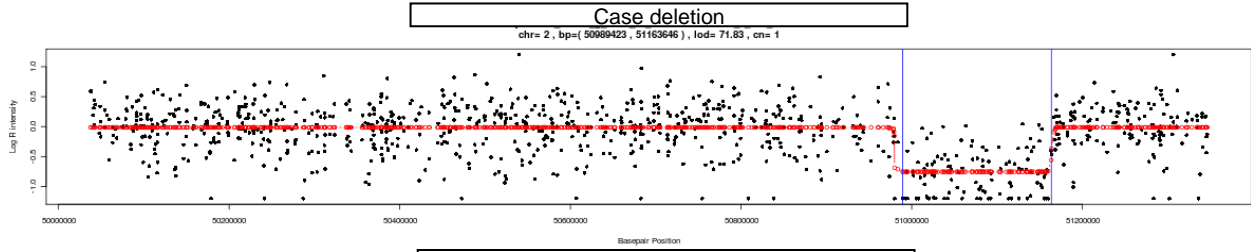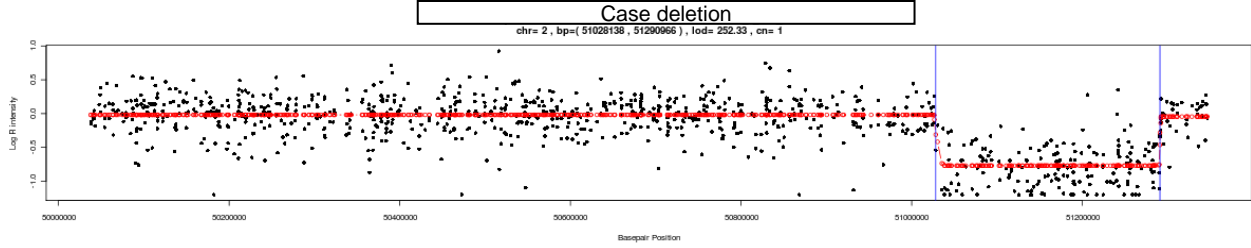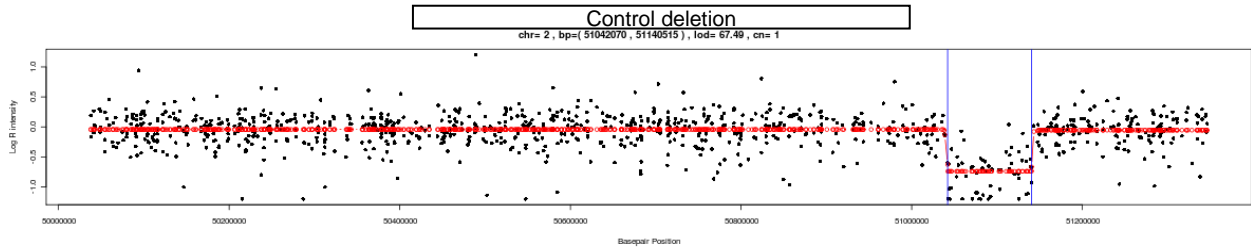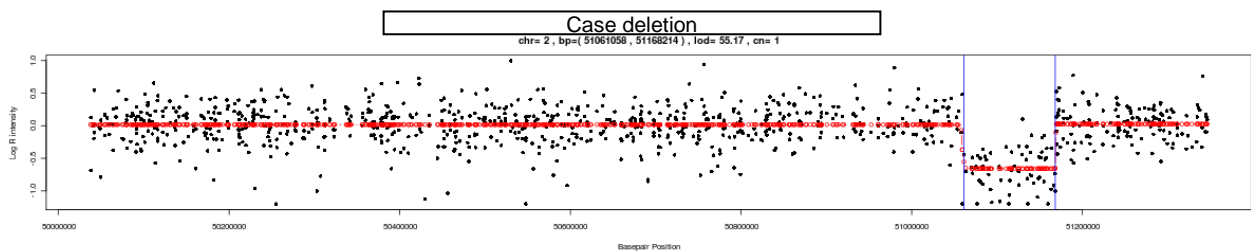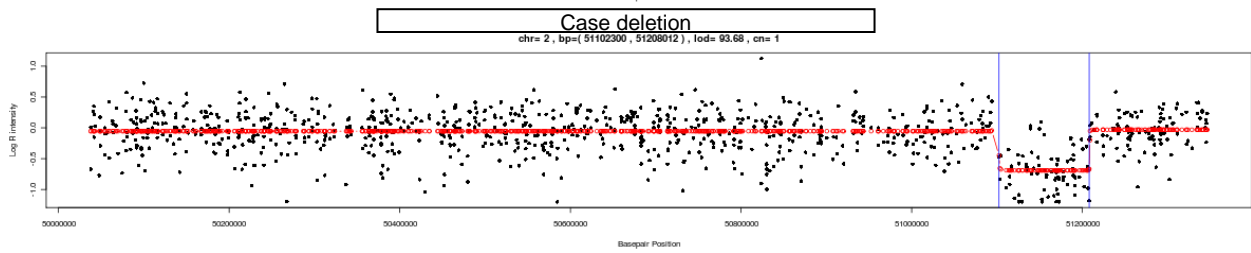

### (3) Long deletions and duplications in 15q13.3

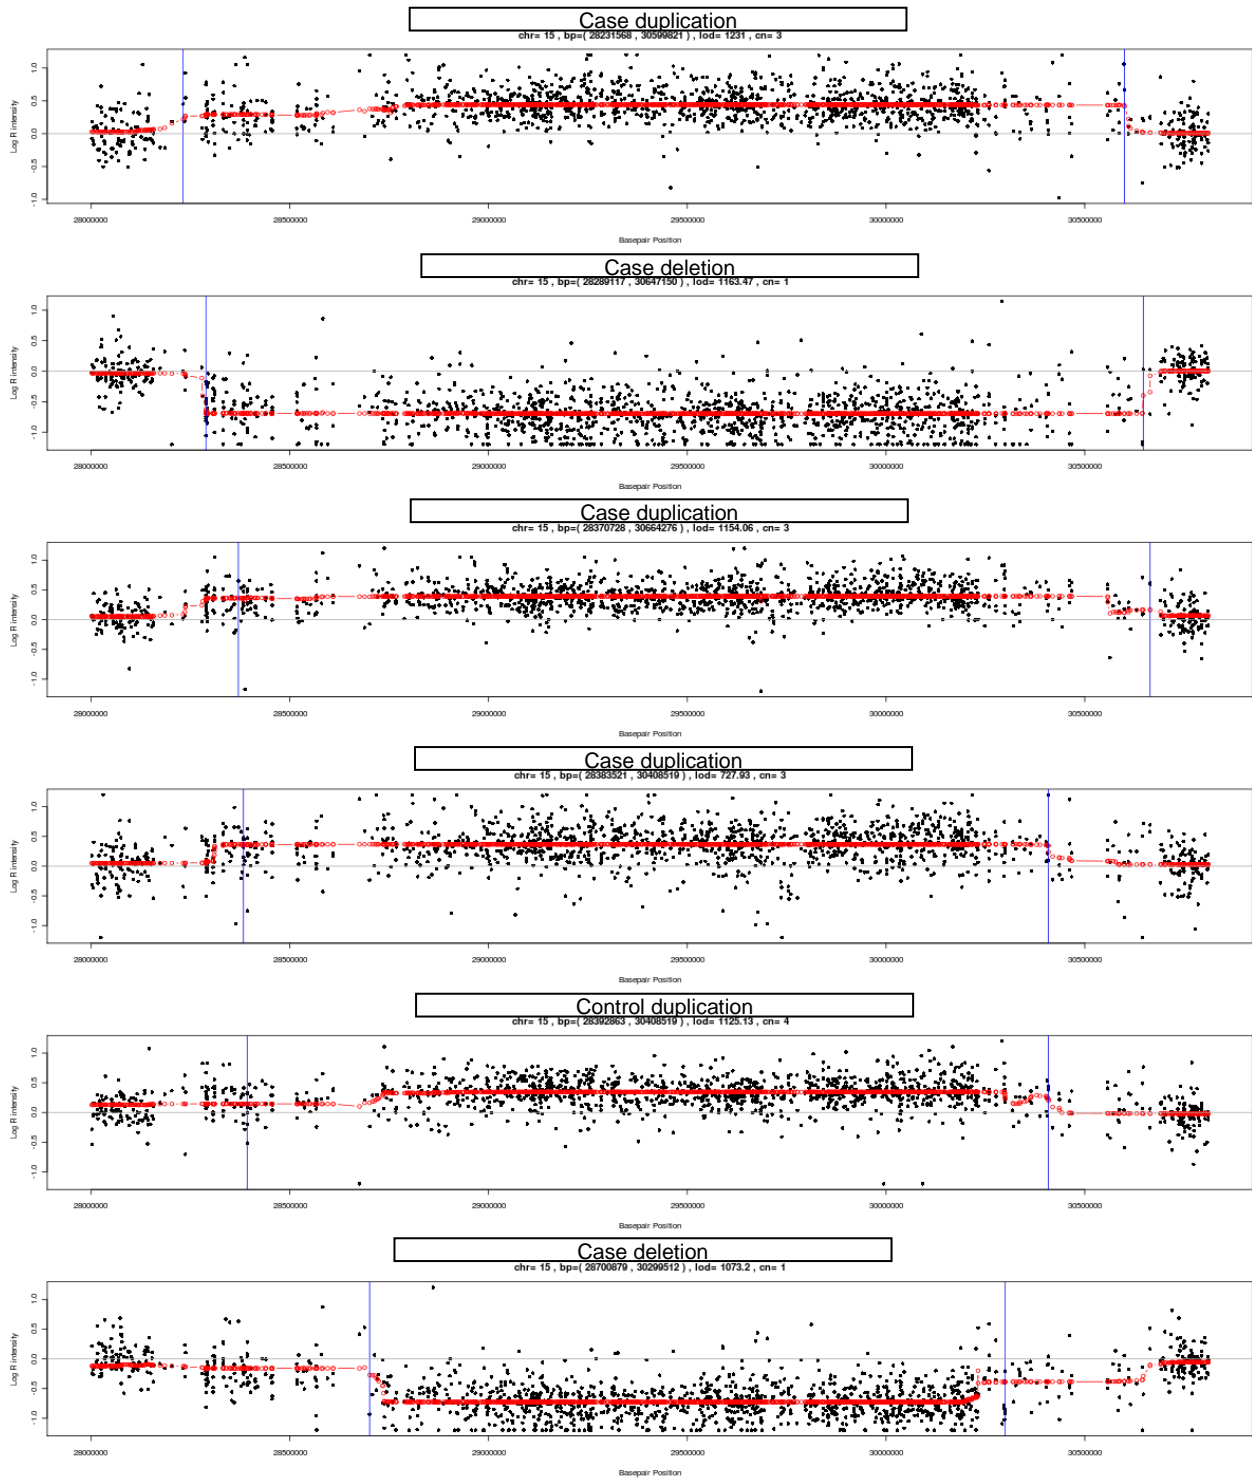

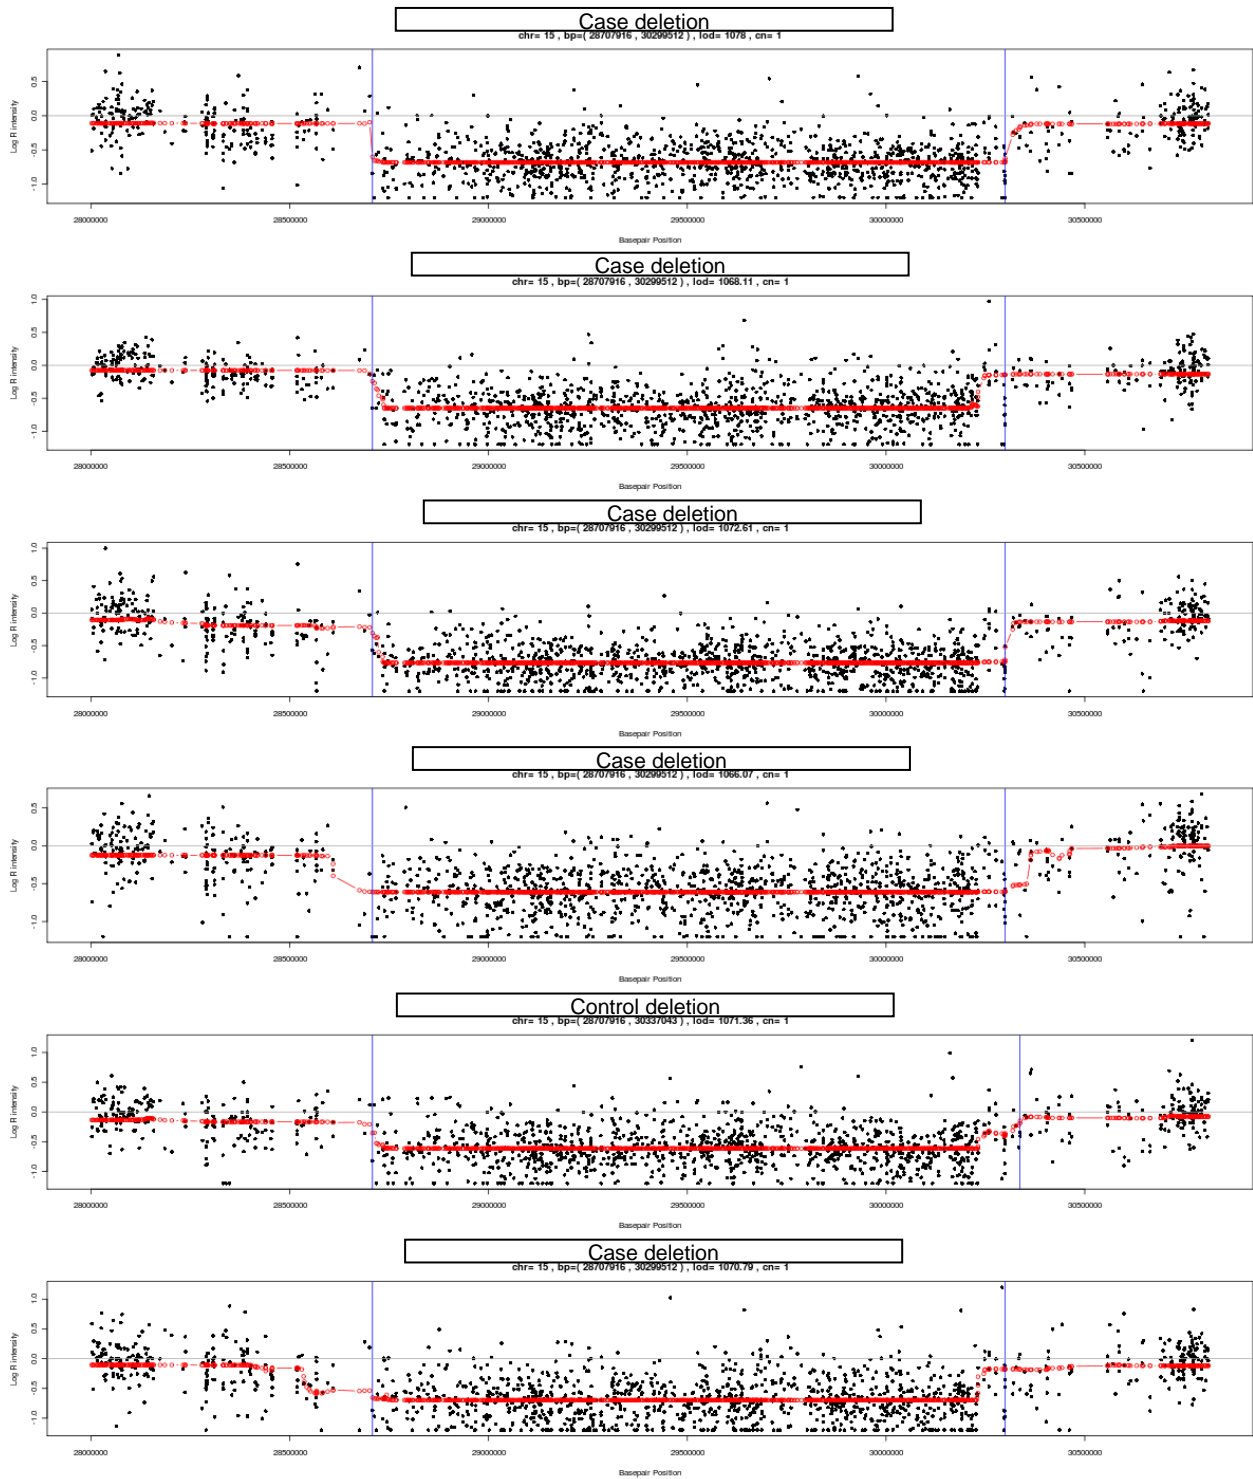

(4) 16p11.2 duplications

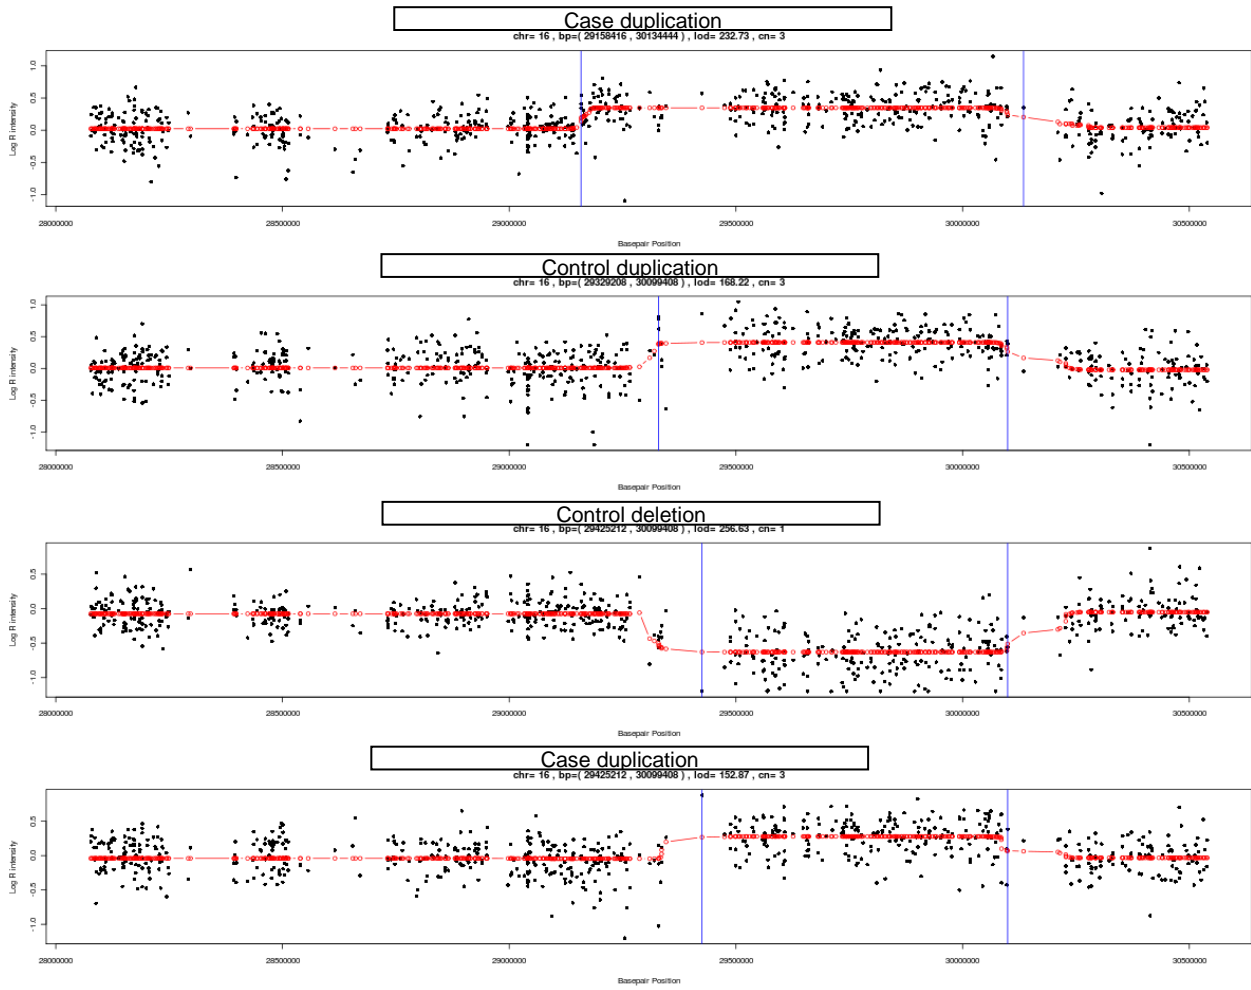

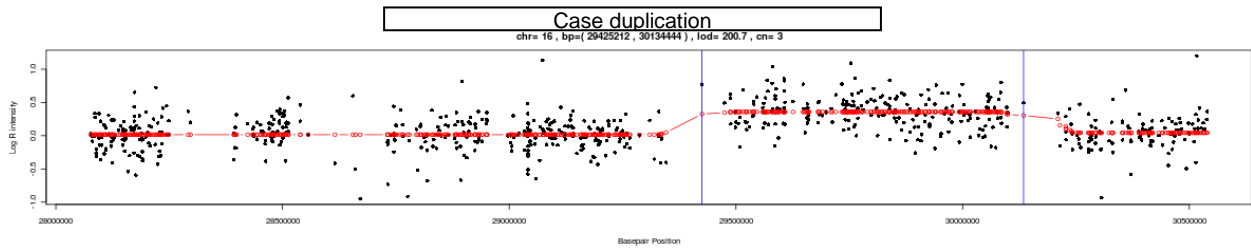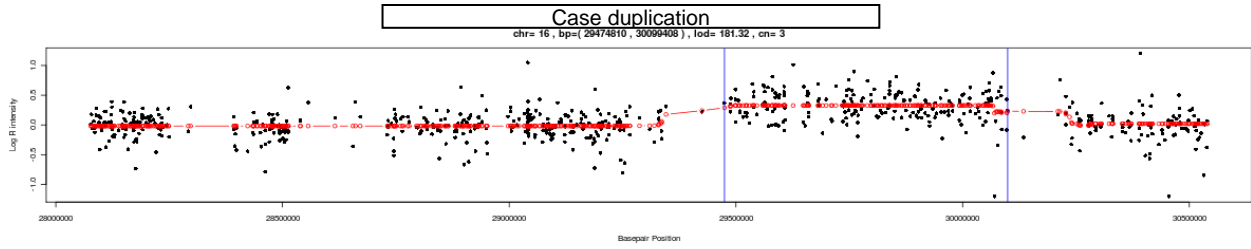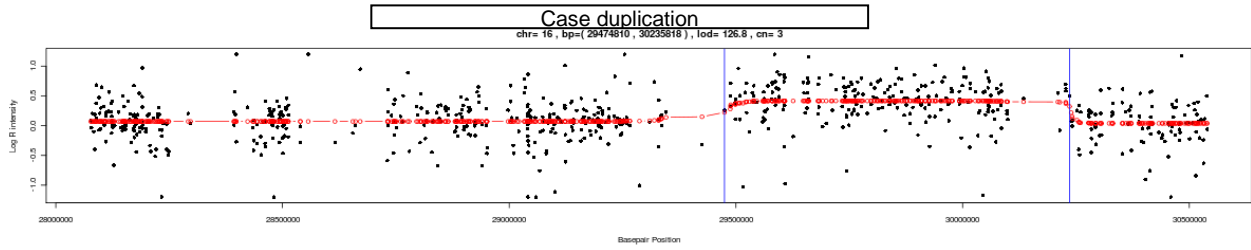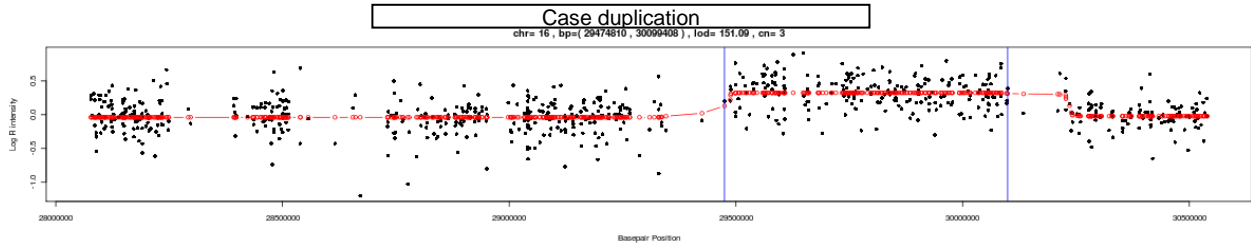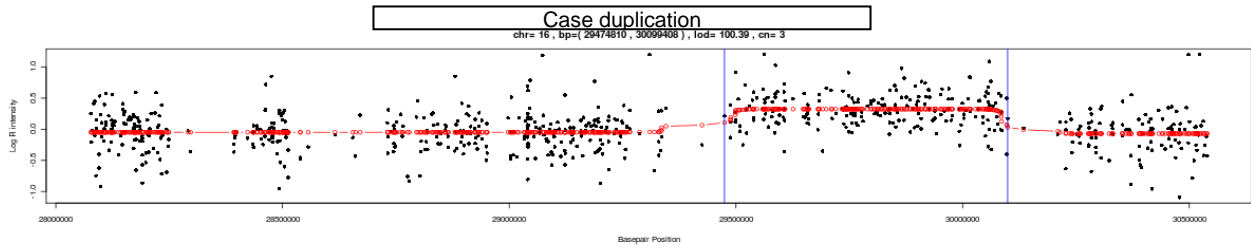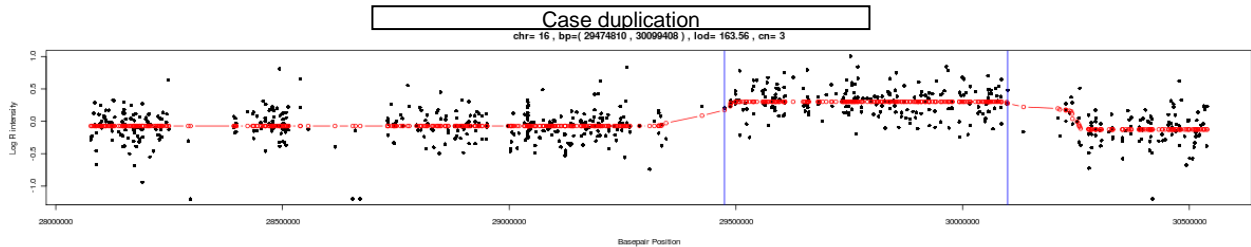

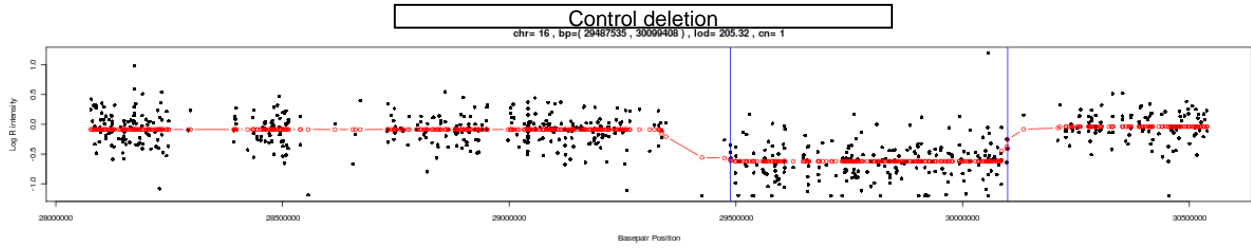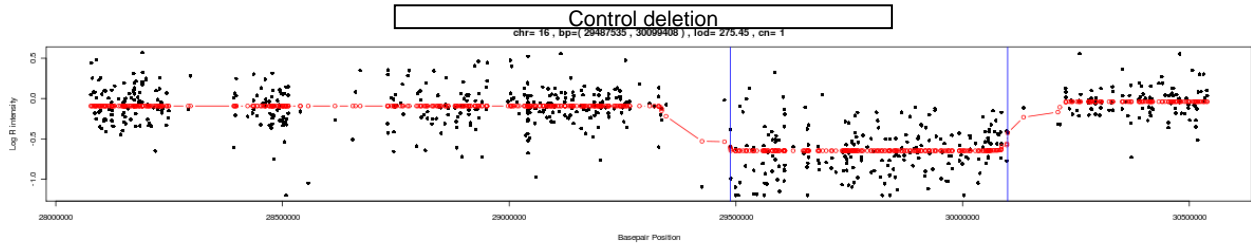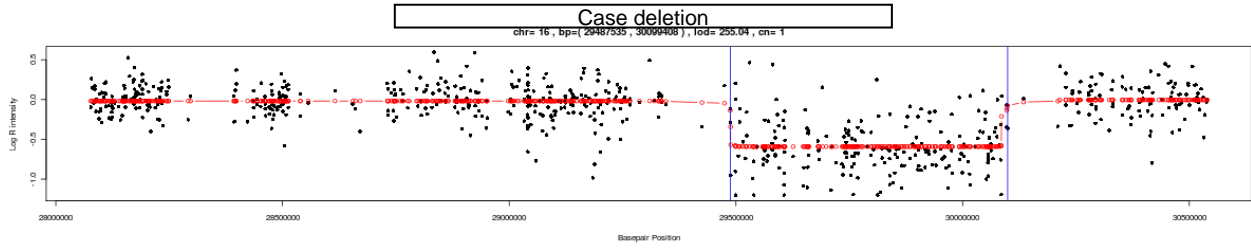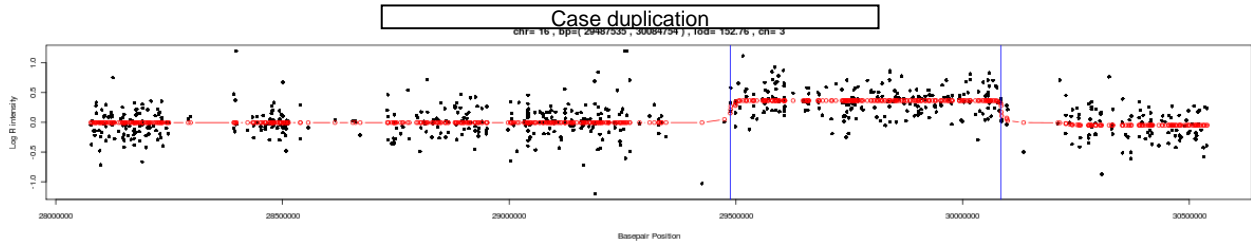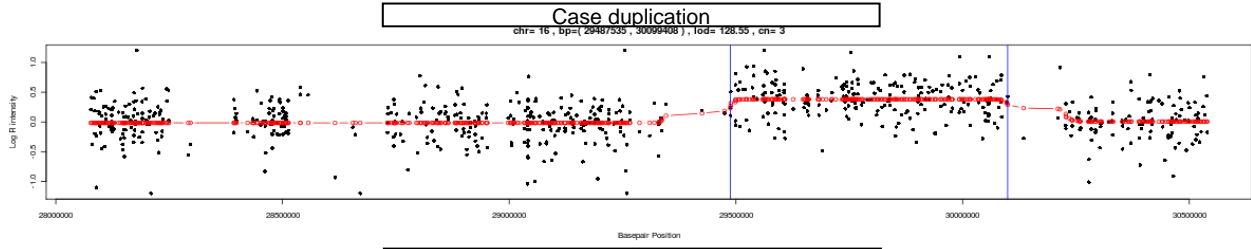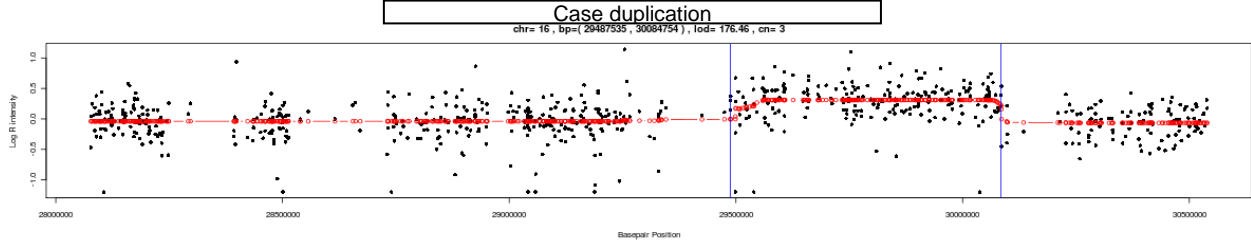

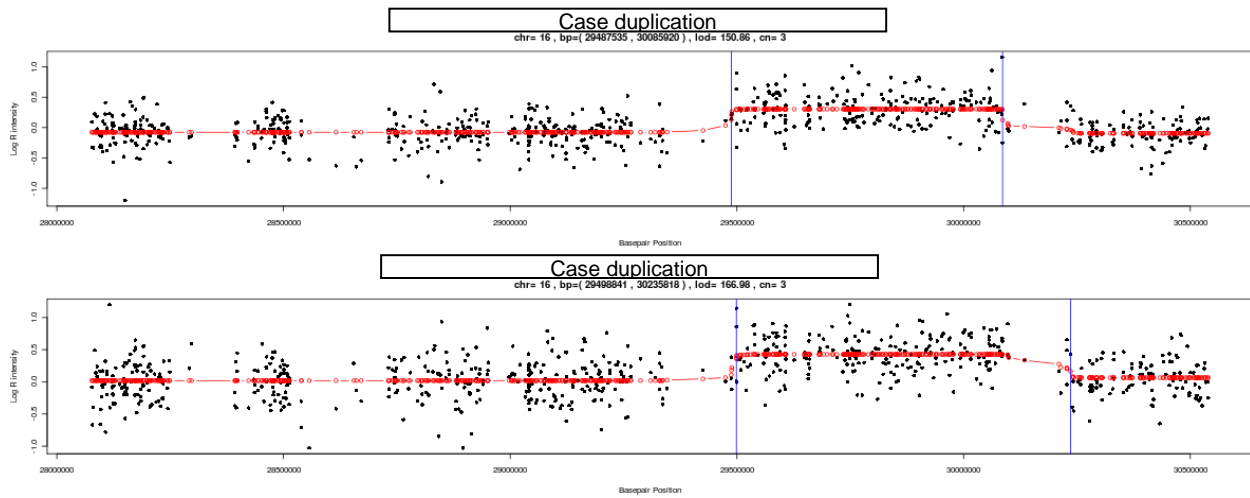

(5) 22q11.21 CNVs. The 21 22q11.21 deletions counted in the analysis in Table 3 are typical of a well-documented CNV as described in the text, with clearcut evidence of the deletion. Therefore we show here only illustrative examples of a case deletion with typical boundaries and a control duplication (6 controls and 2 cases had long 22q11.21 duplications). The third plot is a highly atypical distal case deletion which has not been reported in schizophrenia and whose pathological significance is not known -- it was not counted in the MGS results that included 19 typical and 2 proximal 22q11.21 deletions (all in cases), consistent with previous reports. It does not overlap with the proximal "atypical" deletions that are found in all VCFS studies.)

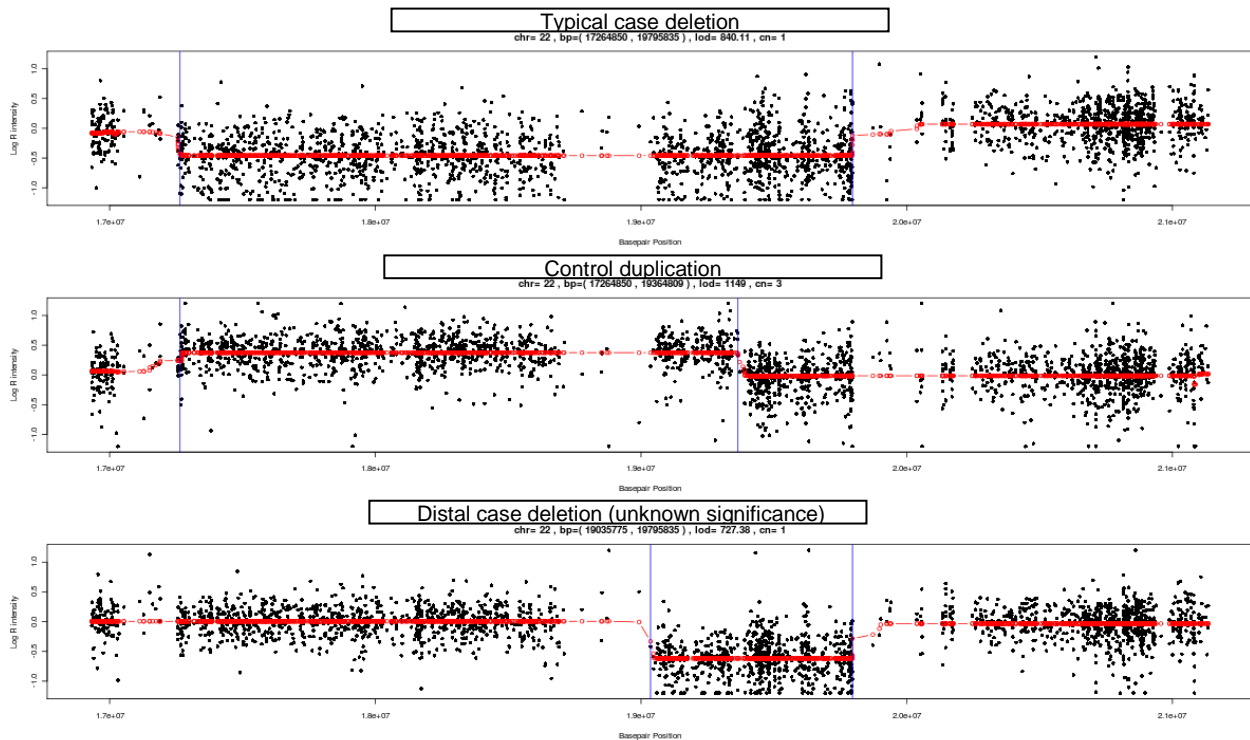

## (6) Duplications in VIPR2

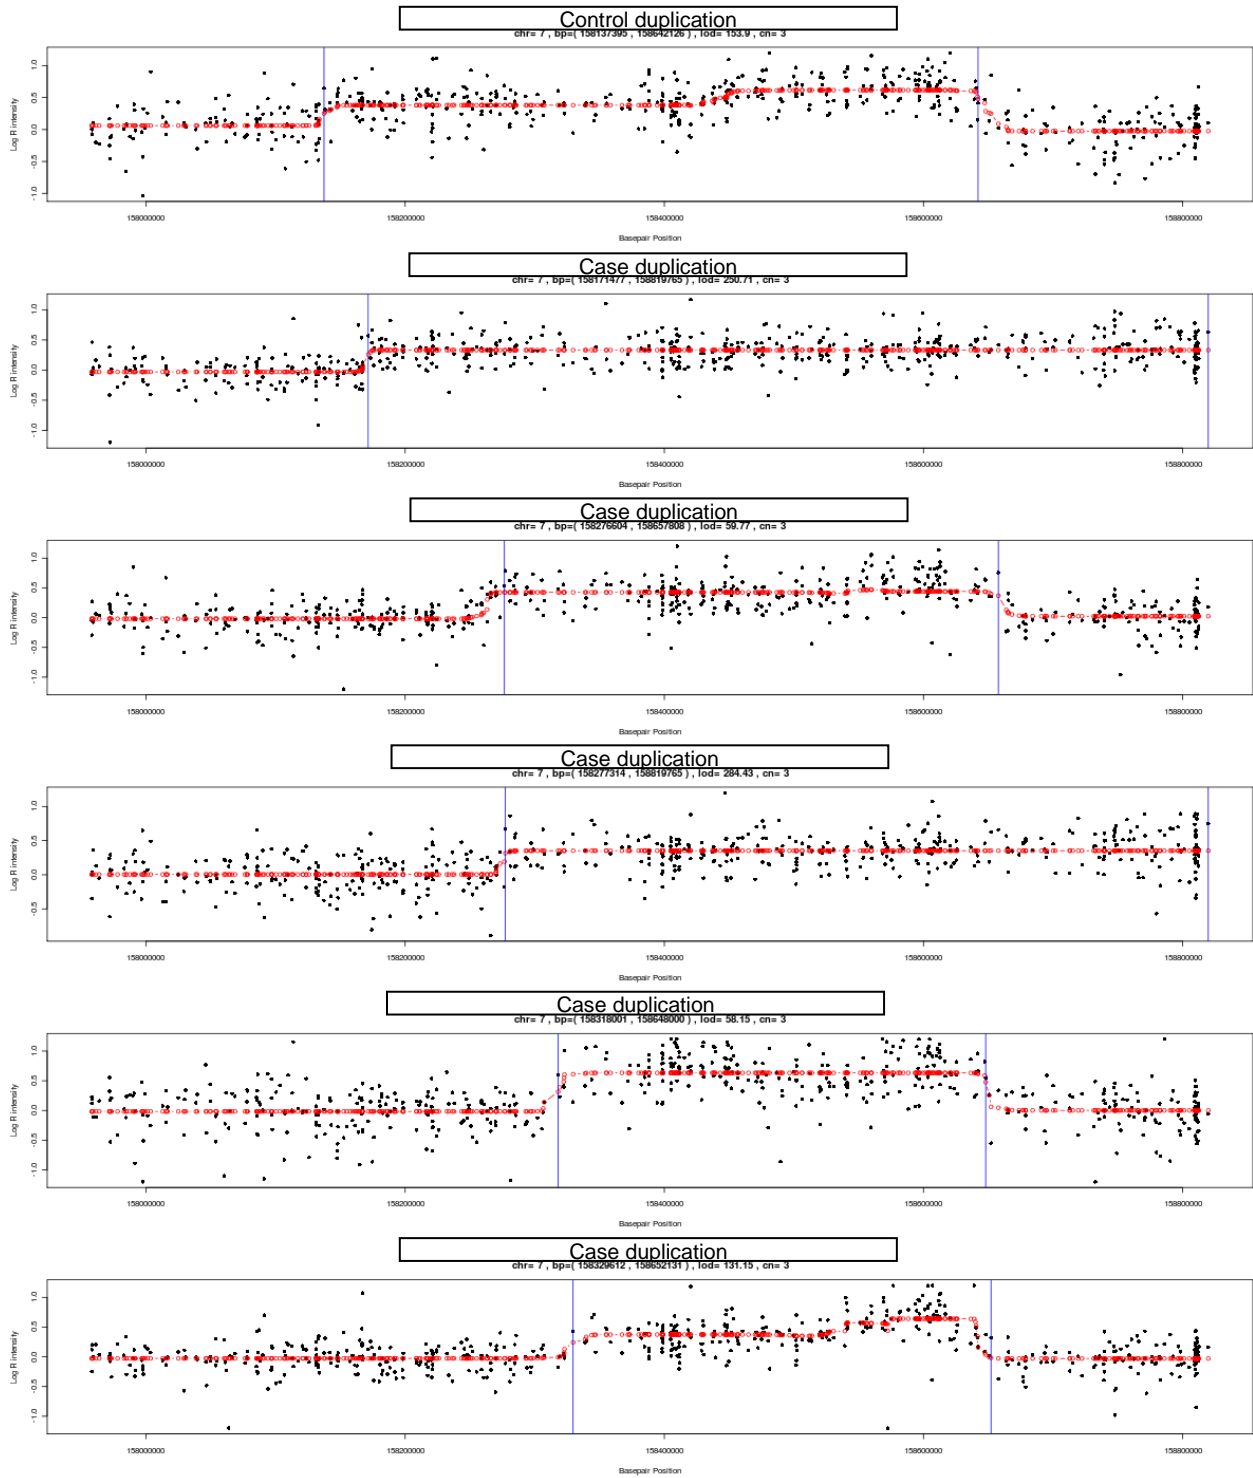



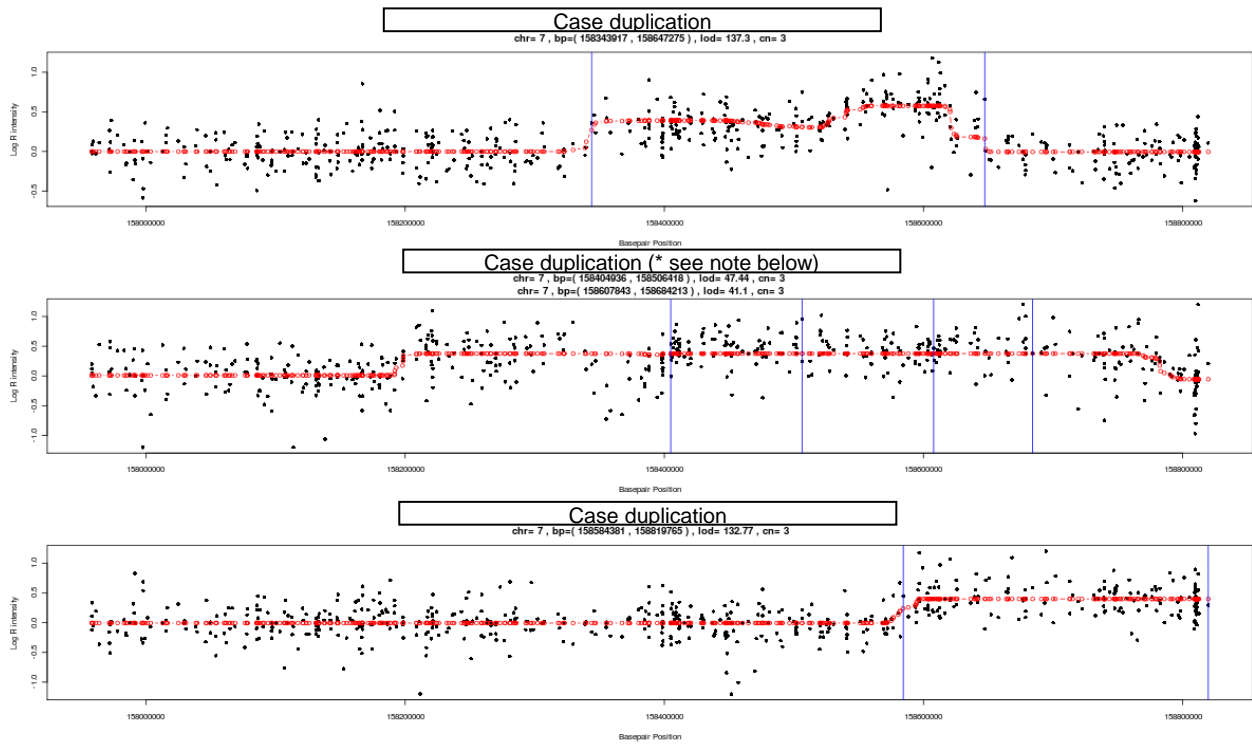

\*Note: Birdseye called two separate duplications in this interval, whereas the algorithm of Lai et al. estimated CN=3 in one continuous and longer interval, which seems more consistent with intensity data. This is typical of the issue of when to “merge” nearby CNVs.

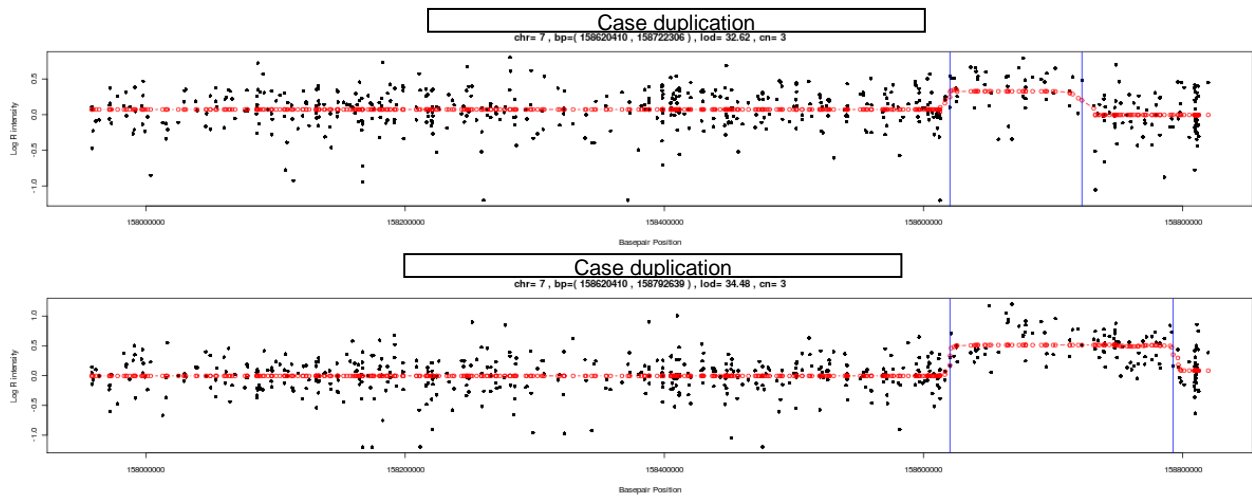

Supplement: NIHMS686964-supplement-Data.pdf [file NIHMS686964-supplement-Data.pdf]
